# 1 Predictive engineering and optimization of tryptophan metabolism in 2 yeast through a combination of mechanistic and machine learning 3 models

4  
5 Jie Zhang<sup>1#</sup>, Søren D. Petersen<sup>1#</sup>, Tijana Radivojevic<sup>2,5,8</sup>, Andrés Ramirez<sup>3</sup>, Andrés Pérez<sup>3</sup>, Eduardo  
6 Abeliuk<sup>4</sup>, Benjamín J. Sánchez<sup>1</sup>, Zachary Costello<sup>2,5,8</sup>, Yu Chen<sup>9,10</sup>, Mike Fero<sup>4</sup>, Hector Garcia  
7 Martin<sup>2,5,8,11</sup>, Jens Nielsen<sup>1,9,12</sup>, Jay D. Keasling<sup>1-2,5-7</sup>, & Michael K. Jensen<sup>1\*</sup>

8  
9 <sup>1</sup> Novo Nordisk Foundation Center for Biosustainability, Technical University of Denmark, Kgs. Lyngby,  
10 Denmark

11 <sup>2</sup> Joint BioEnergy Institute, Emeryville, CA, USA

12 <sup>3</sup> TeselaGen SpA, Santiago, Chile

13 <sup>4</sup> TeselaGen Biotechnology, San Francisco, CA 94107, USA

14 <sup>5</sup> Biological Systems and Engineering Division, Lawrence Berkeley National Laboratory, Berkeley, CA,  
15 USA

16 <sup>6</sup> Department of Chemical and Biomolecular Engineering & Department of Bioengineering, University of  
17 California, Berkeley, CA, USA

18 <sup>7</sup> Center for Synthetic Biochemistry, Institute for Synthetic Biology, Shenzhen Institutes of Advanced  
19 Technologies, Shenzhen, China

20 <sup>8</sup> DOE Agile BioFoundry, Emeryville, CA, USA

21 <sup>9</sup> Department of Biology and Biological Engineering, Chalmers University of Technology, Gothenburg,  
22 Sweden

23 <sup>10</sup> Novo Nordisk Foundation Center for Biosustainability, Chalmers University of Technology, Gothenburg,  
24 Sweden

25 <sup>11</sup> BCAM, Basque Center for Applied Mathematics, Bilbao, Spain

26 <sup>12</sup> BiolInnovation Institute, Ole Maaløes Vej 3, DK-2200 Copenhagen N, Denmark

27  
28 \* To whom correspondence should be addressed. Michael K. Jensen: Email: [mije@biosustain.dtu.dk](mailto:mije@biosustain.dtu.dk), Tel:  
29 +45 6128 4850

30 # These authors contributed equally to this study

## 31 32 SUMMARY

33  
34 In combination with advanced mechanistic modeling and the generation of high-quality  
35 multi-dimensional data sets, machine learning is becoming an integral part of understanding and  
36 engineering living systems. Here we show that mechanistic and machine learning models can

37 complement each other and be used in a combined approach to enable accurate genotype-to-  
38 phenotype predictions. We use a genome-scale model to pinpoint engineering targets and  
39 produce a large combinatorial library of metabolic pathway designs with different promoters  
40 which, once phenotyped, provide the basis for machine learning algorithms to be trained and  
41 used for new design recommendations. The approach enables successful forward engineering  
42 of aromatic amino acid metabolism in yeast, with the new recommended designs improving  
43 tryptophan production by up to 17% compared to the best designs used for algorithm training,  
44 and ultimately producing a total increase of 106% in tryptophan accumulation compared to  
45 optimized reference designs. Based on a single high-throughput data-generation iteration, this  
46 study highlights the power of combining mechanistic and machine learning models to enhance  
47 their predictive power and effectively direct metabolic engineering efforts.

48

#### 49 **KEYWORDS**

50

51 Machine learning, genome-scale metabolic modeling, yeast, biosensor, tryptophan

52

#### 53 **INTRODUCTION**

54 Metabolic engineering is the directed improvement of cell properties through the  
55 modification of specific biochemical reactions (Stephanopoulos, 1999). Beyond offering an  
56 improved understanding of basic cellular metabolism, the field of metabolic engineering also  
57 envisions sustainable production of biomolecules for health, food, and manufacturing industries,  
58 by fermenting feedstocks into value-added biomolecules using engineered cells (Keasling,  
59 2010). These promises leverage tools and technologies developed over recent decades which  
60 include mechanistic metabolic modeling, targeted genome engineering, and robust bioprocess  
61 optimization; ultimately aiming for accurate and scalable predictions of cellular phenotypes from  
62 deduced genotypes (Nielsen and Keasling, 2016; Choi et al., 2019; Liu and Nielsen, 2019).

63 Among the different types of mechanistic models for simulating metabolism, genome-  
64 scale models (GSMs) are one of the most popular approaches, as they are genome-complete,  
65 covering thousands of metabolic reactions. These computational models not only provide  
66 qualitative mapping of cellular metabolism (Hefzi et al., 2016; Monk et al., 2017; Lu et al., 2019),  
67 but have also been successfully applied for the discovery of novel metabolic functions (Guzmán  
68 et al., 2015), and to guide engineering designs towards desired phenotypes (Yang et al.,  
69 2018).As GSMs are built based only on the stoichiometry of metabolic reactions, several  
70 methods have been developed to account for additional layers of information regarding the

71 chemical intermediates and the catalyzing enzymes participating in the metabolic pathways of  
72 interest (Lewis et al., 2012). However, the predictive power of these enhanced models is often  
73 hampered by the limited knowledge and data available for any of such parameters affecting  
74 metabolic regulation (Gardner, 2013; Khodayari et al., 2015; Long and Antoniewicz, 2019).

75 Machine learning provides a complementary approach to guide metabolic engineering  
76 by learning patterns on systems behavior from large experimental data sets (Camacho et al.,  
77 2018). As such, machine learning models differ from mechanistic models by being purely data-  
78 driven. Indeed, machine learning methods for the generation of predictive models on living  
79 systems are becoming ubiquitous, including applications within genome annotation, *de novo*  
80 pathway discovery, product maximization in engineered microbial cells, pathway dynamics, and  
81 transcriptional drivers of disease states (Alonso-Gutierrez et al., 2015; Carro et al., 2010;  
82 Costello and Martin, 2018; Jervis et al., 2019; Mellor et al., 2016; Schläpfer et al., 2017). While  
83 being able to provide predictive power based on complex multivariate relationships (Presnell  
84 and Alper, 2019), the training of machine learning algorithms requires large datasets of high  
85 quality, and thereby imposes certain standards for the experimental workflows. For instance, for  
86 genotype-to-phenotype predictions, it is desirable that datasets contain a high variation between  
87 both genotypes and phenotypes (Carbonell et al., 2019). Also, measurements on the individual  
88 experimental unit, e.g. a strain, should be accurate and obtainable in a high-throughput manner,  
89 in order to limit the number of iterative design-build-test cycles needed in order to reach the  
90 desired output.

91 While mechanistic models require *a priori* knowledge of the living system of interest, and  
92 machine learning-guided predictions require ample multivariate experimental data for training,  
93 the combination of mechanistic and machine learning models holds promise for improved  
94 performance of predictive engineering of cells by uniting the advantages of the causal  
95 understanding of mechanism from mechanistic models with the predictive power of machine  
96 learning (Zampieri et al., 2019; Presnell and Alper, 2019). Metabolic pathways are known to be  
97 regulated at multiple levels, including transcriptional, translational, and allosteric levels  
98 (Chubukov et al., 2014). To cost-effectively move through the design and build steps of complex  
99 metabolic pathways regulated at multiple levels, combinatorial optimization of metabolic  
100 pathways, in contrast to sequential genotype edits, has been demonstrated to effectively  
101 facilitate identification of global optima for outputs of interest (i.e. production; Jeschek et al.,  
102 2017). Searching global optima using combinatorial approaches involves facing an  
103 exponentially growing number of designs (known as the combinatorial explosion), and requires  
104 efficient building of multi-parameterized combinatorial libraries. However, this challenge can be

105 mitigated by the use of intelligently designed condensed libraries which allow uniform  
106 discretisation of multidimensional spaces: e.g. by using well-characterized sets of DNA  
107 elements controlling the expression of candidate genes at defined levels (Jeschek et al., 2016;  
108 Lee et al., 2013). As cellular metabolism is regulated at multiple levels (Feng et al., 2014;  
109 Lahtvee et al., 2017), an efficient search strategy for global optima using combinatorial  
110 approaches should also take this into consideration, e.g. by using mechanistic models, 'omics  
111 data repositories, and *a priori* biological understanding.

112 Here we combine mechanistic and machine learning models to enable robust genotype-  
113 to-phenotype predictions as a tool for metabolic engineering. The approach is exemplified for  
114 predictive engineering and optimization of the complexly regulated aromatic amino acid pathway  
115 that produces tryptophan in baker's yeast *Saccharomyces cerevisiae*. We defined a 7,776-  
116 membered combinatorial library design space, based on 5 genes selected from GSM  
117 simulations and *a priori* biological understanding, each controlled at the level of gene  
118 expression by 6 different promoters from a total set of 30 promoters selected from  
119 transcriptomics data mining. In order to train predictive models for high-tryptophan biosynthesis  
120 rate in yeast, we collected >144,000 experimental data points using a tryptophan biosensor,  
121 exploring this way approximately 4% of the genetic designs of the library design space. Based  
122 on a single Design-Build-Test-Learn cycle focused on sequencing data, growth profiles, and  
123 biosensor output, we trained various machine learning algorithms. Predictive models based on  
124 these algorithms enabled construction of designs exhibiting tryptophan biosynthesis rates 106%  
125 higher than a state-of-the-art high-tryptophan reference strain (Hartmann et al., 2003; Rodriguez  
126 et al., 2015), and up to 17% higher rate than best designs used for training the models.

127

128

## 129 **RESULTS**

### 130 *Model-guided design of high tryptophan production*

131 One prime example of the multi-tiered complexity regulating metabolic fluxes, is the  
132 shikimate pathway, driving the central metabolic route leading to aromatic amino acid  
133 biosynthesis in microorganisms (Lingens et al., 1967; Braus, 1991; Aversch and Krömer,  
134 2018). This pathway has enormous industrial relevance, since it has been used to produce bio-  
135 based replacements of a wealth of fossil fuel-derived aromatics, polymers, and potent human  
136 therapeutics (Curran et al., 2013; Suástegui and Shao, 2016).

137 To search for gene targets predicted to perturb tryptophan production, we initially

138 performed constraint-based modeling for predicting single gene targets, with a simulated  
139 objective of combining growth and tryptophan production (Orth et al., 2010; Ferreira et al.,  
140 2019). From this analysis, we retrieved 192 genes, covering 259 biochemical reactions, that  
141 showed considerable changes as production shifted from growth towards tryptophan production  
142 (Figure 1A-B, Table S4). By performing an analysis for statistical over-representation of  
143 genome-scale modelled metabolic pathways, we observed that both the pentose phosphate  
144 pathway and glycolysis were among the top pathways with a significantly higher number of gene  
145 targets compared to the representation of all metabolic genes (Figure 1C, Table S5). Among the  
146 predicted gene targets in those pathways, *CDC19*, *TKL1*, *TAL1* and *PCK1* were initially selected  
147 as targets for combinatorial library construction (Figure 1B), as these genes have all been  
148 experimentally validated to be directly linked or to have an indirect impact on the shikimate  
149 pathway precursors erythrose 4-phosphate (E4P) and phosphoenolpyruvate (PEP). Specifically,  
150 *CDC19* encodes the major isoform of pyruvate kinase converting PEP into pyruvate to fuel the  
151 tricarboxylic acid (TCA) cycle, while *TKL1* and *TAL1* that encode the major isoform of  
152 transketolase and transaldolase, respectively, in the reversible non-oxidative pentose  
153 phosphate pathway (PPP), have been reported to impact the supply of E4P (Patnaik and Liao,  
154 1994; Curran et al., 2013). Additionally, focusing on the E4P and PEP linkage, *PCK1* encoding  
155 PEP carboxykinase, was also selected due to its regeneration capacity of PEP from  
156 oxaloacetate (Yin, 1996). Lastly, while not being predicted as a target by the constraint-based  
157 modeling approach, the *PFK1* gene, encoding the alpha subunit of heterooctameric  
158 phosphofructokinase, catalyzing the irreversible conversion of fructose 6-phosphate (F6P) to  
159 fructose 1,6-bisphosphate (FBP), was selected, as insufficient activity of this enzyme is known  
160 to cause divergence of carbon flux towards the pentose phosphate pathway in different  
161 organisms across different kingdoms (Wang et al., 2013; Zhang et al., 2016).

162 Next, we mined transcriptomics data sets for the selection of promoters to control the  
163 expression of the five selected candidate genes. Here we focused on well-characterized and  
164 sequence-diverse promoters, to ensure rational designs spanning large absolute levels of  
165 promoter activities and limit the risk of recombination within strain designs and loss of any  
166 genetic elements, respectively (Figure S1; Rajkumar et al., 2019; Reider Apel et al., 2017).  
167 Together, this mining resulted in the selection of 25 sequence-diverse promoters, which  
168 together with the five promoters natively regulating the selected candidate genes, constitutes  
169 the parts catalog for combinatorial library design (Figure 1D; Figure S1, Table S6).

170

171 *Creation of a platform strain for a combinatorial library*

172 To construct a combinatorial library targeting equal representation of thirty promoters  
173 expressing five candidate genes, we harnessed high-fidelity homologous recombination in yeast  
174 together with the targetability of CRISPR/Cas9 genome engineering for a one-pot assembly of a  
175 maximum of 7,776 ( $6^5$ ) different combinatorial designs. Due to the dramatic decrease in  
176 transformation efficiency when simultaneously targeting multiple loci in the genome  
177 (Jakočiūnas et al., 2015), we targeted the sequential deletion of all five selected target genes  
178 from their original genomic loci, and next assemble a cluster of five expression cassettes into a  
179 single genomic landing as recently successfully reported for the "single-locus glycolysis" in  
180 yeast (Kuijpers et al., 2016)(Figure 2A). However, as *CDC19* is an essential gene, and deletion  
181 of *PFK1* causes growth retardation (Breslow et al., 2008; Cherry et al., 2012), this genetic  
182 background would be unsuitable for efficient one-pot transformation. For this reason our  
183 platform strain for library construction had a galactose-curable plasmid introduced expressing  
184 *PFK1*, *CDC19*, *TKL1* and *TAL1* under their native promoters (see METHODS DETAILS), before  
185 performing two sequential rounds of genome engineering to delete *PCK1*, *TKL1* and *TAL1*, and  
186 knock-down *CDC19* and *PFK1* using the weak promoters *RNR2* and *REV1*, respectively (Figure  
187 2A). Furthermore, prior to one-pot assembly of the combinatorial library, we integrated the two  
188 feedback-inhibited shikimate pathway enzymes 3-deoxy-D-arabinose-heptulosonate-7-  
189 phosphate (DAHP) synthase (*ARO4*<sup>K229L</sup>) and anthranilate synthase (*TRP2*<sup>S65R, S76L</sup>) into our  
190 platform strain (Hartmann et al., 2003; Graf et al., 1993), thereby aiming to maximise the impact  
191 from transcriptional regulation of candidate genes on the overall tryptophan output, as removal  
192 of allosteric feedback inhibition is known to increase amino acid accumulation in microbial cells  
193 (Park et al., 2014; Vogt et al., 2014).

194

#### 195 *One-pot construction of the combinatorial library*

196 For library construction, we first tested the transformation by constructing five control  
197 strains, including a strain with native promoters in front of each of the five selected genes  
198 (herein labelled the reference strain; Table S7). Next, we transformed in one-pot the platform  
199 strain with equimolar amounts (1 pmol/part) of double-stranded DNA encoding each of the thirty  
200 promoters, the five open reading frames encoding the candidate genes with native terminators,  
201 a *HIS3* expression cassette for selection, and two 500-bps homology-regions for targeted repair  
202 of the genomic integration site. In total, this design combination included 38 different parts for  
203 7,776 unique 20 kb 13-parts assemblies at the targeted genomic locus (Chr. XII, EasyClone site  
204 V; Figure 2A). Following transformation, we randomly sampled 480 colonies from the library,  
205 together with 27 colonies from the five control strains (507 in total), and successfully cured 423



206 out of 461 (92%) sufficiently growing strains of the complementation plasmid by means of  
207 galactose-induced expression of the dosage-sensitive gene *ACT1* (Figures 2B & S6; Liu et al.,  
208 1992; Makanae et al., 2013). Next, genotyping all promoter-gene junctions by sequencing  
209 (Figure S2), identified 380 out of 461 (82%) of the sufficiently growing strains to be correctly  
210 assembled with only 9 out of 245 (3.7%) of the fully filtered library genotypes observed in  
211 duplicates (245 = 250 library and control genotypes - 5 control genotypes)(Figure 2B). Based on  
212 a Monte Carlo simulation with 10,000 repeated samplings of 10,000 library colonies, and  
213 assuming percent correct assemblies and promoter distribution as determined for the library  
214 sample (Figure 2), the expected no. of unique genotypes among all library colonies was  
215 calculated to be 3,759. This equals an estimated library coverage of 48% (3,759/7,776).  
216 Importantly, all thirty promoters from the one-pot transformation mix were represented in the  
217 genotyped designs, with promoters *PGK1* (no. 14) and *MLS1* (no. 15), represented the least  
218 (1%) and most (35%), respectively (Figure 2C).

219 Taken together, these results demonstrate high transformation efficiency of the platform  
220 strain, high fidelity of parts assembly, and expected high coverage of the genetically diverse  
221 combinatorial library design.

222

### 223 *Engineering a tryptophan biosensor for high-throughput library characterization*

224 In order to support high-throughput analysis of tryptophan accumulation in library strains,  
225 we harnessed the power of modular engineering allosterically regulated transcription factors as  
226 small-molecule *in vivo* biosensors (Mahr and Frunzke, 2016; Rogers et al., 2016). Here, a yeast  
227 tryptophan biosensor was developed based on the *trpR* repressor of the *trp* operon from *E. coli*  
228 (Roesser and Yanofsky, 1991; Gunsalus and Yanofsky, 1980). In order to engineer *trpR* as a  
229 tryptophan biosensor in yeast, we first tested *trpR*-mediated transcriptional repression by  
230 expressing *trpR* together with a GFP reporter gene under the control of the strong *TEF1*  
231 promoter containing a palindromic consensus *trpO* sequence (5'-GTACTAGTT-AACTAGTAC-  
232 3'; Yang et al., 1996) downstream of the TATA-like element (TATTTAAG; Figure 3A; Rhee and  
233 Pugh, 2012). From this, we observed that *trpR* was able to repress GFP expression by 2.4-fold  
234 (Figure S3A). Next, to turn the native *trpR* repressor into an activator with a positively correlated  
235 biosensor-tryptophan readout we fused the Gal4 activation domain to the N-terminus of codon-  
236 optimized *trpR* (*GAL4<sub>AD</sub>-trpR*) expressed under the control of the weak *REV1* promoter (Figure  
237 S3B). For the reporter promoter, we placed *trpO* 97 bp upstream of the TATA-like element of  
238 the *TEF1* promoter (Figure S3B), and observed that *trpR* was able to activate GFP expression  
239 by a maximum of 1.75-fold upon supplementing tryptophan to the cultivation medium (Figure

240 S3B). To further optimize the dynamic range of the reporter output, the GFP reporter was  
241 expressed under a hybrid promoter consisting of tandem repeats of triple *trpO* sequences (i.e.,  
242 in total 6x *trpO* sequences) located 88 bp upstream of the TATA box in an engineered *GAL1*  
243 core promoter without Gal4 binding sites, ultimately enabling *GAL4<sub>AD</sub>-trpR*-mediated biosensing  
244 with a dynamic output range of 5-fold, and an operational input range spanning supplemented  
245 tryptophan concentrations from ~2-200 mg/L (Figure 3B).

246 To further validate the designed biosensor we measured fluorescence output in strains  
247 engineered for expression of feedback-resistant versions of ARO4 and TRP2 (ARO4<sup>K229L</sup> and  
248 TRP2<sup>S65R, S76L</sup>; (Hartmann et al., 2003; Graf et al., 1993), and observed high biosensor outputs  
249 from these strains in line with previously demonstrated high enzyme activities in strains  
250 expressing ARO4<sup>K229L</sup> and TRP2<sup>S65R, S76L</sup> (Hartmann et al., 2003; Graf et al., 1993), and thus  
251 corroborating the ability of the tryptophan biosensor to monitor changes in endogenously  
252 produced tryptophan pools (Figure 3C). Most importantly, we confirmed the biosensor readout  
253 as a valid proxy for tryptophan levels, by comparing external tryptophan titers measured by  
254 HPLC with a change in GFP intensities for 6 library strains spanning 2.5-fold changes in GFP  
255 intensities ( $R^2 = 0.75$ ; Figure 3D).

256 Having established a biosensor for high-throughput screening of the combinatorial  
257 library, we next sought to explore the maximal resolution of the biosensor readout at the single-  
258 design level of growing isoclonal strains, with the intention to define optimal data sampling time  
259 point. To do so, we measured time-series data of OD and GFP in triplicates for all 507 colonies,  
260 covering a total of >144,000 data points (Figure S4). Here, as we observed that the  
261 fluorescence per cell generally stabilized at an OD value of 0.075 and started to decrease  
262 beyond an OD value of 0.15 (Figure 3E, Figure S4, see METHODS DETAILS), and the between  
263 strains variation in fluorescence at the single-cell level was relatively high within this OD-  
264 interval, we chose this interval for determining the GFP synthesis rate as a proxy for tryptophan  
265 flux. By sampling all variant designs, average GFP synthesis rate was observed to vary  
266 between 43.7 and 255.7 MFI/h (approx. 6-fold; Figure 3F), with an average standard error of the  
267 mean of 6.6 MFI/h corresponding to an average coefficient of variation for the mean values of  
268 4.3%. By comparison, the GFP synthesis rate of the platform strain, expressing ARO4<sup>K229L</sup> and  
269 TRP2<sup>S65R, S76L</sup> together with all five candidate genes under native promoters, was 144.8 MFI/h  
270 (Figure 3F).

271

272 *Using machine learning to predict metabolic pathway designs*

273 Having successfully established a combinatorial genetic library and a large phenotypic



274 data set thereof, we next assessed the potential of using machine learning to predict promoter  
275 combinations expected to improve tryptophan productivity. Since there is no algorithm which is  
276 optimal for all learning tasks (Wolpert, 1996), we used two different machine learning  
277 approaches: the Automated Recommendation Tool (ART) and EVOLVE algorithm (Radivojević  
278 et al., 2019; TeselaGen, 2019). The input for both algorithms was the promoter combination and  
279 tryptophan productivity (measured through the GFP proxy, Figure S4). Briefly, ART uses a  
280 Bayesian ensemble approach where eight regressors from the scikit-learn library (Pedregosa et  
281 al., 2011) are allowed to “vote” on a prediction with a weight proportional to their accuracy; the  
282 EVOLVE algorithm is inspired by Bayesian Optimization and uses an ensemble of estimators as  
283 a surrogate model that predicts the outcome of the process to be optimized (see METHODS  
284 DETAILS). As the quality of the data is of paramount importance for machine learning  
285 predictions, we initially filtered our data to avoid genotypes with insufficient growth, no  
286 sequencing data, incorrect assembly, no plasmid curation, or which exhibited more than one  
287 genotype (see METHOD DETAILS; Figure S5). Following this, approximately 58% (266/461) of  
288 the growing strains remained after filtering, while another 3% of the remaining data was  
289 removed because of lack of reproducibility (high error in triplicate measurements)(Figure S5).

290 Both modeling approaches, ART and EVOLVE, were able to recapitulate the data they  
291 were trained on. The average (obtained from 10 independent runs) training mean absolute error  
292 (MAE) of the predicted tryptophan production compared to the measured values was 13.8 and  
293 11.9 MFI/h for the ART and EVOLVE model approaches, respectively, when calculated for the  
294 whole data set (Figure 4A-B). These MAEs represent ~7% and 6% of the full range of  
295 measurements (50 to 200 MFI/h). The train MAE uncertainty (represented by the shaded area in  
296 Figure 4A-B and quantified as the 95% confidence interval from 10 runs) decreased slightly with  
297 increasing size of the training data set for ART, whereas the overall uncertainty was smaller for  
298 the EVOLVE model approach (Figure 4A-B). The ability to predict the production for new  
299 promoter combinations the algorithms had not been trained on was tested by cross-validation,  
300 i.e. by training the model on 90% of the data, and then testing the predictions of this model  
301 against measurements for the remaining 10% (10-fold cross-validation). Here, the average  
302 cross-validated MAE (test MAE) was 21.4 and 22.4 MFI/h for ART and EVOLVE model  
303 approaches, respectively (Figure 4A-B), which represent ~11% of the full range of  
304 measurements. The test MAE decreased systematically with the size of the data set, yet the  
305 decrease rate declined markedly as more data was added. However, while the two approaches  
306 had similar average cross-validated MAEs, the uncertainty of the MAEs was slightly smaller for  
307 ART than for EVOLVE algorithm (Figure 4A-B).

308

309 *Machine learning-guided engineering of designs with high tryptophan productivity*

310 Next, beyond enabling prediction of tryptophan production, we used an exploitative  
311 approach implemented in the ART model and an explorative one adopting the EVOLVE  
312 algorithm to recommend two sets of 30 prioritized designs aiming for high tryptophan production  
313 (Tables S8 and S9). The exploitative model focuses on exploiting the predictive power to  
314 recommend promoter combinations that improve production, whereas the exploratory model  
315 combines predictive power with the estimated uncertainty of each prediction, to recommend  
316 promoter combinations (Radivojević et al., 2019; TeselaGen, 2019).

317 Among the recommendations from each of the two machine learning approaches, two  
318 overlapped (SP588 and SP627, Table S8-S9). Interestingly, while use of *PGK1* promoter to  
319 control *TKL1* expression was underrepresented in the original library sample (Figure 2C), the  
320 explorative set of recommendations included eight (even top-three) designs with *PGK1*  
321 promoter for expression control of *TKL1*, and the exploitative approach included none (Table  
322 S5; Figure 4C-D). From construction of these recommendations, we used the same genome  
323 engineering approach as for library construction (Figure 2A) to successfully construct 19  
324 individual assemblies of the explorative recommendations and 24 individual assemblies of the  
325 exploitative recommendations. Interestingly, we were not able to construct any of the eight  
326 designs with *PGK1* promoter, partially explaining the lower number of viable strains found with  
327 the explorative approach.

328 Of the 41 recommendations constructed, the predictions from both sets generally fitted  
329 well with the measurements, and both approaches successfully enabled predictive strain  
330 engineering for high-performing GFP synthesis rates, with the best recommendation having a  
331 measured GFP synthesis rate 106% higher than the already improved platform design, and  
332 17% higher than the best one in the library sample (Figure 4E-F). Moreover, eight  
333 recommendations were found in the top-ten of productivity, of which four were from the  
334 exploitative set, three were from the explorative set, and one overlapping between the two sets.  
335 Comparing the output of the ART and EVOLVE approaches, the variation in measurements was  
336 higher for strains recommended with the explorative EVOLVE approach than for strains  
337 recommended with the exploitative ART approach (Figure 4E-F), and the explorative approach  
338 included recommendations based on a more diverse set of promoters than the exploitative  
339 approach (Figure 4C-D). Still, taken together, both approaches successfully enabled predictive  
340 engineering of a strain with tryptophan productivity beyond those previously observed (Figure  
341 4E-F).

342

## 343 **DISCUSSION**

344 We have demonstrated that mechanistic and machine learning approaches can  
345 complement and enhance each other, enabling a more effective predictive engineering of living  
346 systems. Using a single design-build-test-learn cycle, this study i) leveraged mechanistic  
347 genome-scale models to select and rank reactions/genes most likely to affect production, ii)  
348 included the efficient one-pot construction of a library with different promoter combinations for  
349 these reactions, and iii) used machine learning algorithms trained on the ensuing phenotyping  
350 data to choose novel promoter combinations that further enhance tryptophan productivity. In  
351 total, we managed to increase the tryptophan synthesis rate by 106% compared to an already  
352 improved reference strain (ARO4<sup>K229L</sup> and TRP2<sup>S65R, S76L</sup>).

353 To gather the large data sets required to enable machine learning approaches, we  
354 developed a biosensor which enabled the sampling of >144,000 GFP intensity measurements  
355 as a proxy for tryptophan flux for 1,728 isoclonal designs in a high-throughput fashion (Figures  
356 3E, S5A). Indeed, while requiring a few design iterations (Figures 3A, S3), the tryptophan  
357 biosensor ultimately allowed us to i) phenotypically characterize an order of magnitude higher  
358 number of strains than in previous machine learning-guided metabolic engineering studies  
359 (Alonso-Gutierrez et al., 2015; Lee et al., 2013a; Redding-Johanson et al., 2011; Zhou et al.,  
360 2018a), and ii) identify optimal sampling points that displayed the largest differences between  
361 genotypes (Figures 3C, S4). Likewise, one-pot CRISPR/Cas9-mediated genome editing was a  
362 vital enabling technology for this project, since it allowed us to efficiently create a diverse 20-kb  
363 clustered combinatorial library with representation of all 30 specified sequence- and expression-  
364 diverse promoters to control five expression units, including very few duplicate designs (Figure  
365 2B-C).

366 Enabled by this high-quality data set, we used two different machine learning models for  
367 predicting productivity (ART and EVOLVE algorithm), and two different approaches to  
368 recommend new strains (exploitative and explorative). Cross-validation showed that both  
369 models could be trained to show good correlations (MAE approximately 11% of the  
370 measurement range) between predictions and measurements for data they had not seen  
371 previously (test data). The test MAE was basically the same for the two models, and plateaued  
372 quickly as a function of the number of genotypes in the training data set (Figure 4A-B). Whereas  
373 the uncertainty in predictive accuracy decreased considerably with the number of genotypes in  
374 the data set, this decrease was similar for both models. With this in mind, a relevant guideline  
375 for choosing a recommendation approach should focus on the desired outcome: the explorative

376 approach providing a more diverse set of recommendations (Figure 4C-D), whereas the  
377 exploitative approach provides less varied recommendations. We observed the largest  
378 improvement in productivity when using the exploitative approach (Figure 4E-F). However, if  
379 subsequent design-build-test-learn cycles are performed, the diversity of recommendations of  
380 the explorative approach could help avoid local optima of tryptophan production(Figure 4E-F).

381 Notably, while the recommendations were able to improve production, the predictions  
382 from both machine learning models were noticeably worse than for the library, reflecting the  
383 general challenge of extrapolating outside of the previous range of measurements. As such, we  
384 envision that future machine learning approaches will need to focus on models able to  
385 extrapolate more efficiently.

386 With respect to advancing biological understanding of tryptophan metabolism, the results  
387 provided examples of anticipated results as well as non-intuitive predictions. The best  
388 performing strain (SP606, Table S8) predicted by machine-learning, displayed knock-downs of  
389 both *CDC19* and *PFK1*, corroborating our intuitive strategies for increasing precursor  
390 availability: i.e. lower pyruvate kinase activity would lead to higher PEP pools, while limiting  
391 glycolysis redirects carbon flux into PPP and subsequently increases E4P. However, this strain  
392 also had low expression of *TKL1* and high expression of *TAL1*, despite the report that  
393 overexpression of *TKL1*, rather than *TAL1*, leads to higher aromatic amino acid production in  
394 both *E. coli* and yeast (Curran et al., 2013). This finding remarks the importance of carefully  
395 considering the systems-level context of these “metabolic rules of thumb” (e.g. overexpress  
396 *TKL1* instead of *TAL1* for higher amino acid production) to ensure their validity. Consistently,  
397 both the second (SP616) and third (SP624) best performing strains, also predicted by machine  
398 learning, had low expression of *TKL1* and high expression of *TAL1*, together with very low  
399 expression (*TPK2* promoter) for *PFK1* and high expression of *CDC19*. One possible explanation  
400 is that, although normally expressed, the pyruvate kinase activity could be limited by low level of  
401 its allosteric activator FBP due to limited PFK expression. Another plausible explanation is that  
402 medium-high expression of *PCK1* (conversion of oxaloacetate to PEP) by *ACT1* or *TDH3*  
403 promoters in these two strains can replenish PEP pools consumed by pyruvate kinase. The fact  
404 that 8 out of 10 top-performing strains had high expression of *PCK1*, which was not predicted to  
405 be impactful on glucose by the GSM approach, indicates that this indeed has a positive effect  
406 on tryptophan biosynthesis rate, and stresses the importance of combining mechanistic and  
407 machine learning approaches.

408 Ultimately, in our case study, machine learning models have demonstrated significant  
409 predictive power. However, this predictive power is heavily dependent on the availability of high

410 quality experimental data, which is not a prerequisite for mechanistic GSMs. Without any  
411 experimental input, GSMs are able to guide metabolic engineering using various constraint-  
412 based algorithms, which, however, predict a large number of potential targets and may also  
413 miss some effective ones, e.g. *PFK1* in our study. This could be due to the lack of other  
414 information beyond metabolism e.g. regulation in GSMs. To address this problem, manual  
415 efforts are currently needed to filter out less relevant targets, and add intuitively promising ones  
416 based on existing knowledge and literature mining. Additionally, future GSMs that include more  
417 biological aspects and suitable predicting algorithms are envisioned to further improve gene  
418 target selection. Irrespective of the ongoing efforts for model-guided engineering of living cells,  
419 this study highlights the enhanced predictive power obtained by combining GSMs for selecting  
420 genetic targets with machine learning algorithms for leveraging experimental data. Finally, as  
421 even more efficient methods for combining data-driven machine learning algorithms and GSMs  
422 are developed, we envision dramatic improvements in our ability to engineer virtually any cell  
423 system effectively.

424

## 425 **ACKNOWLEDGMENTS**

426

427 This work was supported by the Novo Nordisk Foundation and the European  
428 Commission Horizon 2020 programme (grant agreement No. 722287 and No. 686070). This  
429 work was also part of the DOE Agile BioFoundry (<http://agilebiofoundry.org>), supported by the  
430 U.S. Department of Energy, Energy Efficiency and Renewable Energy, Bioenergy Technologies  
431 Office, and the DOE Joint BioEnergy Institute (<http://www.jbei.org>), supported by the Office of  
432 Science, Office of Biological and Environmental Research, through contract DE-AC02-  
433 05CH11231 between Lawrence Berkeley National Laboratory and the U.S. Department of  
434 Energy. The Department of Energy will provide public access to these results of federally  
435 sponsored research in accordance with the DOE Public Access Plan  
436 (<http://energy.gov/downloads/doe-public-access-plan>). H.G.M. was also supported by the  
437 Basque Government through the BEREC 2014-2017 program and by Spanish Ministry of  
438 Economy and Competitiveness MINECO: BCAM Severo Ochoa excellence accreditation SEV-  
439 2013-0323. This work was also supported by the Chilean economic development agency, Corfo,  
440 through grant 17IEAT-73382.

441

## 442 **AUTHOR CONTRIBUTIONS**

443

444 JZ, SDP, JDK, JN and MKJ conceived the study. JZ and SDP conducted all  
445 experimental work, YC and BJS all mechanistic modelling, and TR, ZC, and HGM developed  
446 and applied statistical modelling and recommendations based on ART, while EA, AR, and MF  
447 developed and applied statistical modelling and recommendations based on TeselaGen  
448 EVOLVE model. SDP, JZ, and MKJ wrote the manuscript.

449

## 450 **DECLARATION OF INTERESTS**

451

452 JDK has a financial interest in Amyris, Lygos, Demetrix, Maple Bio, and Napigen. EA  
453 and MF have a financial interest in TeselaGen Biotechnology.

454

## 455 **FIGURE LEGENDS**

456

457 **Figure 1. Selection of gene targets and promoters for combinatorial engineering of**  
458 **tryptophan metabolism in *S. cerevisiae*.** (A) Gene-gene interaction network built with  
459 Cytoscape (Shannon et al., 2003), showing that pentose phosphate pathway and glycolysis are  
460 both in the core of metabolism in close proximity to many genes. Nodes are all 909 genes in  
461 yeast metabolism (Aung et al., 2013), sharing connections based on the number of shared  
462 metabolites by the corresponding reactions that the genes are related to: the thicker the edge,  
463 the higher the number of shared metabolites. Currency metabolites such as water, protons,  
464 ATP, etc. are removed from the analysis. The prefuse force directed layout is used for  
465 displaying the network. Genes are highlighted with a yellow border if they are selected targets  
466 by the mechanistic modeling approach, and in orange and dark blue if they belong to the  
467 pentose phosphate pathway or glycolysis, respectively. (B) Simplified map of metabolism  
468 showing the selected gene targets from glycolysis (dark blue) and pentose phosphate pathway  
469 (orange) based on a combination of mechanistic genome-scale modeling and literature studies  
470 for optimizing tryptophan production. Black dashed lines indicate multi-step reactions. Dashed  
471 green line indicates allosteric activation. G6P, glucose 6-phosphate; F6P, fructose 6-phosphate;  
472 FBP, fructose 1,6-bisphosphate; GAP, glyceraldehyde 3-phosphate; DHAP, dihydroxyacetone  
473 phosphate; PEP, phosphoenolpyruvate; OAA, oxaloacetate; 6PG, 6-phosphogluconate; E4P,  
474 erythrose 4-phosphate; S7P, sedoheptulose 7-phosphate; DAHP, 3-deoxy-7-  
475 phosphoheptulonate; Tyr, tyrosine; Phe, phenylalanine; Trp, tryptophan. (C) Percentage of  
476 genes in glycolysis (dark blue) and pentose phosphate pathway (orange) that were predicted by  
477 the mechanistic modelling to increase tryptophan production compared to the percentage of



478 genes predicted as targets from the whole metabolism. \*\*\* = P-value < 0.05, Fisher's exact  
479 testing. (D) Relative mRNA abundance, calculated for each gene as the proportion of mRNA  
480 reads obtained for any given promoter relative to the total sum of mRNA reads from each bin of  
481 six promoters. Absolute abundances for the 30 promoters were measured in *S. cerevisiae*  
482 CEN.PK 113-7D in the mid-log phase (Rajkumar et al., 2019). The promoters are grouped  
483 according to intended combinatorial gene associations.

484

485 **Figure 2. Construction and validation of the 13-parts assembled 20 kb combinatorial**  
486 **promoter:gene library.** (A) Strategy for library construction including a 13-part *in vivo* assembly  
487 for the reintegration of target genes into a single genomic locus. The platform strain used for  
488 one-pot transformation includes a total of 9 genome edits for knock-out, knock-down and  
489 heterologous expression of candidate genes (see METHODS DETAILS). (B) Key descriptive  
490 statistics for the library construction and genotyping. (C) Promoter distribution (name, %  
491 representation) by gene. Color intensity correlates with promoter strength (see Figure 1D).

492

493 **Figure 3. Phenotypic library characterization using an engineered tryptophan biosensor.**  
494 (A) Schematic illustration of the design of the tryptophan (Trp) biosensor ( $trpR_{AD}$ ) engineered in  
495 this study. The  $trpR_{AD}$  indicates the engineering tryptophan biosensor comprised of the *E. coli*  
496 TrpR fused to the GAL4 activation domain. The biosensor regulates and engineered reporter  
497 (yeGFP) *GAL1*-promoter including 6x copies of TrpR binding sites (*trpO*), placed upstream the  
498 TATA box of *GAL1* promoter ( $pGAL1\_6x\_trpO$ ). (B) Fluorescence normalized by optical density  
499 (OD600) for two strains related to concentration of tryptophan supplemented media (Mean  
500 Fluorescence Intensity/OD, MFI/OD with standard errors, n = 3). Both strains contain the yeGFP  
501 reporter under the control of the  $pGAL1\_6x\_trpO$  reporter promoter, and only one strain  
502 expresses the Gal4 activation domain fused to trpR (in green). (C) Fluorescence normalized by  
503 OD600 for a wild-type strain and strains with expression of feedback-resistant versions of ARO4  
504 and TRP2, ARO4<sup>K229L</sup> and TRP2<sup>S65R,S76L</sup>, respectively (mean fluorescence intensity, MFI/h with  
505 standard errors, n = 3). (D) Extracellular tryptophan normalized by OD600 related to  
506 fluorescence normalized by OD600 (mean values with standard errors, n = 3). (E) Fluorescence  
507 divided by OD600 related to OD600 for library and control strains. Dashed lines are shown at  
508 OD600 equals 0.075 and 0.15. (F) Measured mean green fluorescent protein synthesis rate.  
509 MFI/h with standard errors, n = 3. The data is ranked according to increasing mean rate. The  
510 strain with five native promoters expressing the five candidate genes is highlighted in green.  
511 MFI = Mean Fluorescence Intensity. OD600 = Optical density (600 nm). a.u. = arbitrary units.

512

513 **Figure 4. Machine learning-guided predictive engineering of tryptophan metabolism.** (A-  
514 B) Learning curves for ART and EVOLVE algorithms, respectively. Mean absolute error (MAE)  
515 from model training and testing as a function of the number of genotypes in the dataset. Shaded  
516 areas represent 95% confidence intervals. Blue curves indicate MAE when calculated for the  
517 whole data set (Train), while red curves indicate the cross-validation, i.e. by training the models  
518 on 80% of the data and then testing the predictions of this model against measurements for the  
519 remaining 20% (Test). (C-D) Promoter distributions for the 30 recommendations of the  
520 exploitative (ART) and explorative (EVOLVE) approach, respectively. The orders and colors of  
521 promoters correspond to those in Figure 1C. (E-F) Cross-validated predictions vs average of  
522 measured GFP synthesis rate for the exploitative (ART) and explorative (EVOLVE) approach,  
523 respectively. Data is shown for library and controls strains (grey markers; green markers show  
524 the platform strain expressing ARO4<sup>K229L</sup> and TRP2<sup>S65R,S76L</sup>), as well as for recommended  
525 strains (blue markers; orange markers show recommendations that overlap between the two  
526 approaches).

527

## 528 TABLES

529

## 530 STAR\*METHODS

531

532 Detailed methods are provided in the online version of this paper and include the following:

- 533 - KEY RESOURCES TABLE
- 534 - CONTACT FOR REAGENT AND RESOURCE SHARING
- 535 - EXPERIMENTAL MODEL AND SUBJECT DETAILS
- 536 - METHOD DETAILS
  - 537 - Mechanistic modeling of high tryptophan flux
  - 538 - Promoter selection
  - 539 - General strain construction
  - 540 - Platform strain construction
  - 541 - Construction of combinatorial library
  - 542 - Development of tryptophan biosensor
  - 543 - Validation of biosensor by HPLC
  - 544 - Genomic DNA sequencing
  - 545 - Measuring fluorescence and growth

- 546 - QUANTIFICATION AND STATISTICAL ANALYSIS  
 547 - Modelling  
 548 - DATA AND SOFTWARE AVAILABILITY

549  
 550

551 **STAR\*METHODS**

552

553 Detailed methods are provided in the online version of this paper and include the following:

554

555 **KEY RESOURCES TABLE**

556

| REAGENT or RESOURCE                                                                                                    | SOURCE                                                                                                                                                   | IDENTIFIER                     |
|------------------------------------------------------------------------------------------------------------------------|----------------------------------------------------------------------------------------------------------------------------------------------------------|--------------------------------|
| <b>Chemicals, Peptides, and Recombinant Proteins</b>                                                                   |                                                                                                                                                          |                                |
| yeast synthetic drop-out media                                                                                         | Sigma                                                                                                                                                    | P#:Y2001                       |
| LB medium                                                                                                              | Sigma                                                                                                                                                    | P#:L3522                       |
| Ampicillin                                                                                                             | Sigma                                                                                                                                                    | P#:A0166                       |
| L-Leucine                                                                                                              | Sigma                                                                                                                                                    | P#:L8912                       |
| Uracil                                                                                                                 | Sigma                                                                                                                                                    | P#:U1128                       |
| L-Tryptophan                                                                                                           | Sigma                                                                                                                                                    | P#: T0254                      |
| PEG                                                                                                                    | Sigma                                                                                                                                                    | Cat#P3640-1KG                  |
| LiAc                                                                                                                   | Sigma                                                                                                                                                    | Cat#517992-100G                |
| Salmon sperm                                                                                                           | Sigma                                                                                                                                                    | Cat#D9156                      |
| <b>Critical Commercial Assays</b>                                                                                      |                                                                                                                                                          |                                |
| PlateSeq PCR Kits                                                                                                      | Eurofins                                                                                                                                                 | PID:3094-000PPP                |
| <b>Deposited Data</b>                                                                                                  |                                                                                                                                                          |                                |
| RNAseq data (Arun)                                                                                                     | (Rajkumar et al., 2019)                                                                                                                                  | N/A                            |
| Genotypes                                                                                                              | The Joint BioEnergy Institute's Inventory of Composable Elements (ICE; <a href="https://public-registry.jbei.org">https://public-registry.jbei.org</a> ) | Zhang and Petersen et al. 2019 |
| Time series                                                                                                            | The Joint BioEnergy Institute's Experiment Data Depot (EDD; <a href="https://public-edd.jbei.org">https://public-edd.jbei.org</a> )                      | Zhang and Petersen et al. 2019 |
| <b>Experimental Models: Organisms/Strains</b>                                                                          |                                                                                                                                                          |                                |
| <i>MATa his3Δ1, LEU2, ura3-52, TRP1 MAL2-8c SUC2</i>                                                                   | EUROSCARF                                                                                                                                                | CEN.PK113-11C                  |
| <i>MATa his3Δ1, leu2-3_112, ura3-52, trp1-289, MAL2-8c SUC2</i>                                                        | EUROSCARF                                                                                                                                                | CEN.PK2-1C                     |
| <i>MATa P<sub>GAL1core_6xtrp0</sub>-yEGFP-T<sub>ADH1</sub>, P<sub>TEF1_trp0</sub>-mKate2-T<sub>CYC1</sub>, pCfB176</i> | This study                                                                                                                                               | TrpA-1                         |
| <i>MATa P<sub>GAL1core_6xtrp0</sub>-yEGFP-T<sub>ADH1</sub>, P<sub>TEF1_trp0</sub>-mKate2-</i>                          | This study                                                                                                                                               | TrpA-2                         |

|                                                                                                                                                                                                                                                                                                                                                |                                                                                                                  |                                                                       |
|------------------------------------------------------------------------------------------------------------------------------------------------------------------------------------------------------------------------------------------------------------------------------------------------------------------------------------------------|------------------------------------------------------------------------------------------------------------------|-----------------------------------------------------------------------|
| $T_{CYC1}$ , $ARO4^{wt}::ARO4^{K229L}$ , pCfB176                                                                                                                                                                                                                                                                                               |                                                                                                                  |                                                                       |
| $MATa$ $P_{GAL1core\_6xtrpO^-}yEGFP-T_{ADH1}$ , $P_{TEF1\_trpO^-}mKate2-T_{CYC1}$ , $TRP2^{wt}::TRP2^{S65R, S76L}$ , pCfB176                                                                                                                                                                                                                   | This study                                                                                                       | TrpA-3                                                                |
| $MATa$ $P_{GAL1core\_6xtrpO^-}yEGFP-T_{ADH1}$ , $P_{TEF1\_trpO^-}mKate2-T_{CYC1}$ , $ARO4^{wt}::ARO4^{K229L}$ , $TRP2^{wt}::TRP2^{S65R, S76L}$ , pCfB176                                                                                                                                                                                       | This study                                                                                                       | TrpA-4                                                                |
| $MATa$ $tkl1\Delta$ $tal1\Delta$ $pck1\Delta$ , $P_{PFK1}::P_{REV1^-}PFK1$ ,<br><br>$P_{CDC19}::P_{RNR2^-}CDC19$ , $P_{PFK1^-}GAL4_{ad^-}trpR-T_{ADH1}$ ,<br>$P_{GAL1core\_3xtrpO^-}yEGFP-T_{ADH1}$ , $P_{TEF1\_trpO^-}mKate2-T_{CYC1}$ ,<br>$P_{PGK1^-}ARO4^{K229L}-T_{ADH1}$ ,<br>$P_{TEF1^-}TRP2^{S65R, S76L}-T_{CYC1}$ , pCfB176, pCfB9307 | This study                                                                                                       | TrpNA-W                                                               |
| <b>Recombinant DNA</b>                                                                                                                                                                                                                                                                                                                         |                                                                                                                  |                                                                       |
| Plasmids used in the study, see Table S2                                                                                                                                                                                                                                                                                                       | This study                                                                                                       | N/A                                                                   |
| <b>Oligonucleotides</b>                                                                                                                                                                                                                                                                                                                        |                                                                                                                  |                                                                       |
| Primers for strain construction, plasmid construction and sequencing, see Table S1                                                                                                                                                                                                                                                             | This study                                                                                                       | N/A                                                                   |
| <b>Software and Algorithms</b>                                                                                                                                                                                                                                                                                                                 |                                                                                                                  |                                                                       |
| Chromleon™ Chromatography Data System Software v7.1.3                                                                                                                                                                                                                                                                                          | Thermo fisher<br>( <a href="https://www.thermofisher.com/">https://www.thermofisher.com/</a> )                   | Chromleon™ CDS<br>7.1.3                                               |
| Python and standard packages for data analysis                                                                                                                                                                                                                                                                                                 | Python ( <a href="https://www.python.org">https://www.python.org</a> )                                           | N/A                                                                   |
| <i>S. cerevisiae</i> v7 consensus genome scale model                                                                                                                                                                                                                                                                                           | Sourceforge<br>( <a href="https://sourceforge.net/projects/yeast/">https://sourceforge.net/projects/yeast/</a> ) | Yeast 7.0                                                             |
| COBRA Toolbox                                                                                                                                                                                                                                                                                                                                  | Github ( <a href="https://github.com">https://github.com</a> )                                                   | opencobra/cobratoolbox                                                |
| GSM analysis                                                                                                                                                                                                                                                                                                                                   | Github ( <a href="https://github.com">https://github.com</a> )                                                   | biosustain/trp-scores                                                 |
| ART                                                                                                                                                                                                                                                                                                                                            | Github ( <a href="https://github.com">https://github.com</a> )                                                   | JBEI/AutomatedRecommendationTool                                      |
| Teselagen EVOLVE model                                                                                                                                                                                                                                                                                                                         | TeselaGen's platform<br>( <a href="https://teselagen.com">https://teselagen.com</a> )                            | EVOLVE module                                                         |
| Code for preprocessing and ART modelling approach                                                                                                                                                                                                                                                                                              | Github ( <a href="https://github.com">https://github.com</a> )                                                   | Zhang and Petersen et al. 2019 (sorpet/Zhang_and_Petersen_et_al_2019) |

557

## 558 CONTACT FOR REAGENT AND RESOURCE SHARING

559

560 Further information and requests for resources and reagents should be directed to and  
561 will be fulfilled by the Lead Contact, Michael Krogh Jensen (mije@biosustain.dtu.dk).

562

## 563 **EXPERIMENTAL MODEL AND SUBJECT DETAILS**

564

565 *Saccharomyces cerevisiae* strains were derived from CEN.PK2-1C (EUROSCARF,  
566 Germany). These were cultivated in yeast synthetic drop-out media (Sigma-Aldrich) at 30 °C.  
567 *Escherichia coli* DH5 $\alpha$  were cultivated in LB medium containing 100 mg/l ampicillin (Sigma-  
568 Aldrich) at 37 °C.

569

## 570 **METHOD DETAILS**

571

### 572 *Mechanistic modeling of high tryptophan flux*

573 In order to select targets for increased tryptophan accumulation, we followed a  
574 constraint-based strategy implemented in a recent study (Ferreira et al., 2019), similar to the  
575 FSEOF approach (Choi et al., 2010). Briefly, flux balance analysis (FBA; Orth et al., 2010) was  
576 used to simulate growth of *S. cerevisiae* at 11 different sub-optimal growth conditions ranging  
577 from 30% to 80% of the maximum specific growth rate, with all remaining flux oriented towards  
578 tryptophan accumulation. Based on these simulations, a score was calculated for each reaction  
579 in metabolism as the average simulated flux fold-change compared to maximum growth rate  
580 conditions. These reaction scores were in turn used to compute gene scores, by averaging the  
581 associated reaction scores. A gene score higher than one means that the gene is associated to  
582 reactions that increase in flux as tryptophan production increases, and could point to a target for  
583 overexpression. On the other hand, a gene score lower than one signifies that the gene is  
584 connected to reactions that decrease their flux as tryptophan production increases, and  
585 therefore could be a target for downregulation. The analysis was performed with either glucose  
586 or ethanol as carbon sources, so to find candidates under a mixed-fermentation regime, a  
587 purely respiratory regime and the overlap between both regimes. The 7th version of the  
588 consensus genome-scale model of *S. cerevisiae* (Aung et al., 2013), a parsimonious FBA  
589 (pFBA) approach (Lewis et al., 2010), and the COBRA toolbox (Heirendt et al., 2019) were used  
590 for all simulations.

591

### 592 *Promoter selection*

593 Each of the five gene targets was expressed under six unique promoters. The six  
594 promoters included the promoter native to the gene as well as 5 promoters chosen to span a  
595 wide expression range. All promoters were chosen based on absolute mRNA abundances  
596 measured for *S. cerevisiae* CEN.PK 113-7D in the mid-log phase (Rajkumar et al., 2019), and

597 unless otherwise stated were 1 kb in length by default. To minimize homologous recombination  
598 during one-pot transformation for library construction and potential loop-out of promoters and  
599 genes following genomic integration, all scanned promoter sequences were aligned to ensure  
600 there were no extensive homologous sequence stretches.

601

#### 602 *General strain construction*

603 Strains were edited using the CasEMBLR method (Jakoćiućnas et al., 2015). All  
604 integration were directed towards EasyClone sites (Jensen et al., 2014). Homology regions  
605 between DNA parts were by default 30 bp, and homology regions, framing the repair assembly,  
606 were about 0.5 kb. Yeast transformations were performed by LiAc/SS carrier DNA/PEG method  
607 (Gietz and Schiestl, 2007). DNA parts and plasmids were purified using kits from Macherey-  
608 Nagel. PCR products for USER assembly were amplified using Phusion U Hot Start PCR  
609 Master Mix (ThermoFisher), bricks for transformation by Phusion High-Fidelity PCR Master Mix  
610 with HF Buffer (ThermoFisher), whereas colony PCRs were performed using 2xOneTaq Quick-  
611 Load Master Mix with Standard Buffer (New England Biolabs). Genomic DNA was extracted  
612 from overnight cultures using Yeast DNA Extraction Kit (Thermo Scientific). Oligos were  
613 purchased from IDT. Sequencing was performed by Eurofins. All primers, plasmids, and yeast  
614 strains, are listed in Tables S1, S2, and S3, respectively.

615

#### 616 *Platform strain construction*

617 Several enzymes within the aromatic amino acid (AAA) biosynthesis are subject to  
618 allosteric regulations. Specifically, 3-deoxy-D-arabino-heptulosonate-7-phosphate (DAHP)  
619 synthase (encoded by *ARO4*), which controls the entry of the shikimate pathway, is feedback  
620 inhibited by all three aromatic amino acids, although to different extents. Anthranilate synthase  
621 (encoded by *TRP2*), which catalyzes the first committed step towards the tryptophan branch, is  
622 also inhibited by its end product tryptophan (Braus, 1991). To maximise the transcriptional  
623 regulatory effect on the tryptophan flux, and benchmark with current state-of-the-art in shikimate  
624 pathway optimization, feedback resistant variants of these two enzymes, *ARO4*<sup>K229L</sup> (Hartmann  
625 et al., 2003) and *TRP2*<sup>S65R, S76L</sup> (Graf et al., 1993), were overexpressed under the *TEF1* and  
626 *TDH3* promoters, respectively at EasyClone site XI-3 (JessopćFabre et al., 2016; Table S2).  
627 Secondly, a tryptophan biosensor system (see Library phenotypic characterization) was  
628 introduced by integrating corresponding sensor and reporter sequences into EasyClone sites at  
629 Chr. XI-2 and XI-5, respectively (Jensen et al., 2014).

630



### 631 *Construction of combinatorial library*

632 Due to the dramatic decrease in transformation efficiency targeting multiple loci in the  
633 genome (Jakočiūnas et al., 2015), we opted for removing all five target genes from their original  
634 loci and assemble the five expression units into a single cluster for targeted integration into  
635 EasyClone site XII-5 (Jensen et al., 2014), and thereby ensuring comparable genomic  
636 accessibility of all genes. While *PCK1*, *TKL1* and *TAL1* were successfully knocked out; deleting  
637 *PFK1* and/or *CDC19* was unsuccessful. Alternatively, we replaced *PFK1* and *CDC19* promoters  
638 with weak *REV1* and *RNR2* promoters, respectively. Due to an expected loss of activity in  
639 phosphofructokinase (PFK1) and pyruvate kinase (CDC19), and consequently slow ATP  
640 generation, the resulting strain (TrpNA-W) grew extremely poorly and was barely transformable  
641 using linear DNA fragments for assembly. To overcome this limitation, the TrpNA-W strain was  
642 complemented with plasmid pCfB9307 (Table S2) harboring *PFK1*, *CDC19*, *TKL1* and *TAL1*  
643 genes, which restored the growth to the wild type level. The plasmid backbone carries yeast  
644 *ACT1* gene under the control of *GAL1* promoter, which can be used as counter-selection of the  
645 plasmid due to the growth arrest caused by *ACT1* overexpression on galactose as the sole  
646 carbon source (Makanae et al., 2013, Figure S6).

647 For combinatorial library construction we adopted CasEMBLR (Jakočiūnas et al.,  
648 2015). Briefly, five target genes together with a *HIS3* expression cassette (in the order of *PCK1*-  
649 *TAL1-TKL1-CDC19-PFK1-HIS3*) were assembled in the same orientation and integrated at  
650 EasyClone site XII-5 (Jensen et al., 2014). All five target genes (the complete ORFs) together  
651 with their terminators (500 bp downstream of the stop codon) were amplified from the genomic  
652 DNA of yeast strain CEN.PK113-7D using primers listed in Table S1. All 30 promoters (defined  
653 as the 1000 bp upstream the ORF) were amplified using primers with a 30 bp overlap to  
654 adjacent DNA parts (i.e. the terminator upstream and the target gene). All promoters can be  
655 found in [Tables S4](#). The *HIS3* cassette was amplified from plasmid pRS413-HIS3 (Sikorski and  
656 Hieter, 1989) with primers 30 bp overlapping with the *PFK1* terminator and fragment  
657 homologous to the downstream of XII-5. The *HIS3* cassette was included as one part of the  
658 assembly. The one-pot transformation of all 38 parts (30 promoters, 5 candidate genes, *HIS3*  
659 cassette, and up- and down-homology regions for EasyClone site XII-5) was performed with 50  
660 mL the base strain grown to an optical density of 1.0 (equivalent to 6.5 mg of cell dry weight),  
661 5.0 ug of plasmid expressing the guide RNA targeting XII-5, and 1.0 picomole of each of 13  
662 DNA fragments. A total of 480 colonies were picked from 10 transformation plates by dividing  
663 the area of each individual plate into 4 subareas of equal size and picking 12 colonies of varying  
664 size from each subarea.

665 Finally, the complementation plasmid introduced was cured by culturing strains to  
666 stationary phase twice in media with galactose instead of glucose as carbon source (Figure S6).  
667 The success of curing were then gauged by a growth assay where LEU auxotrophs were  
668 considered as cured and prototrophs as not cured. Control strains and recommended strains  
669 were constructed similarly to the library strains except that instead of transforming pools of  
670 promoter parts for each gene only specific promoters were transformed per gene.

671

### 672 *Development of tryptophan biosensor*

673 The yeast tryptophan biosensor was developed based on the *trpR* repressor of the *trp*  
674 operon from *E. coli* (Gunsalus and Yanofsky, 1980). The *trpR* gene was amplified from *E. coli*  
675 M1665 genome. All yeast promoters as well as the activator domain of *GAL4* were amplified  
676 from *S. cerevisiae* strain CEN.PK113-7D genome. All designs of *trpR* biosensor and GFP  
677 reporter were first cloned into the pRS416 (*URA3*) and pRS413 (*HIS3*) vectors, respectively, by  
678 USER cloning (Bitinaite et al., 2007). The activator domain of *GAL4* (*GAL4<sub>AD</sub>*) was fused to *trpR*  
679 with a GSGSGS linker by USER cloning. The *trpO* sequence was inserted into the *TEF1*  
680 promoter 8 bp downstream of the TATA-like element (TATTTAAG) by inverse PCR from a  
681 plasmid containing the *P<sub>TEF1</sub>-yEGFP-T<sub>ADH1</sub>* cassette, with both primers containing the overhang  
682 AACTAGTAC (ie., half of the *trpO* sequence). The linear PCR product was treated with DpnI  
683 enzyme to fragment the template plasmid and self-ligated to generate circular plasmid (Quick  
684 Ligation™ Kit, NEB). Promoters containing multiple *trpO* sequences were constructed by USER  
685 cloning from a synthetic DNA fragment (Integrated DNA Technologies) of a minimal *GAL1*  
686 promoter (-329 to -5 relative to the *GAL1* open reading frame, thus without the *GAL4* binding  
687 sequence which is located at -435 to -418) with 3x tandem repeats of *trpO* (separated by 2  
688 nucleotides) inserted at 88 bp upstream of the TATA box (TATATAAA). Plasmids containing the  
689 sensor and reporter cassettes were transformed into yeast strain CEN.PK113-11C. To test the  
690 biosensor performance, yeast transformants were grown in selection media overnight and  
691 regrown in Delft medium supplemented with various tryptophan concentrations (2-1000 mg/L)  
692 for 6 hrs (typically reaching early exponential phase). GFP and mKate2 outputs were measured  
693 on SynergyMX microtiter plate reader (BioTek) with excitation/emission at 485/515 nm and  
694 588/633 nm, respectively, and always normalized by absorbance at 600 nm (OD600nm). To  
695 construct the base strain for library assembly, the tryptophan sensor (*P<sub>REV1</sub>-GAL4<sub>AD</sub>-trpR-T<sub>ADH1</sub>*)  
696 and the reporter cassette (*P<sub>GAL1core\_3xtrpO</sub>-yEGFP-T<sub>ADH1</sub>*, *P<sub>TEF1\_trpO</sub>-mKate2-T<sub>CYC1</sub>*) were integrated  
697 into strain TC-3 (Jakočiūnas et al., 2015) at the EasyClone sites XI-2 and XI-5 (Jessop & Fabre  
698 et al., 2016), respectively.

699

### 700 *Validation of biosensor by HPLC*

701 To validate the correlation between biosensor reporter gene output and tryptophan  
702 production, we quantified extracellular tryptophan levels by HPLC using a method described by  
703 Luo et al. (2019). Supernatants of cultivated strains were separated from the culture broth  
704 following 24 hrs of cultivation in synthetic dropout medium without tryptophan and histidine.  
705 From this 200 µl was used for HPLC and the data were processed using Chromeleon™  
706 Chromatography Data System Software v7.1.3.

707

### 708 *Genomic DNA sequencing*

709 Genomic DNA was extracted from overnight cultures using method described by Lööke  
710 et al. (2011). Each extract was used as template in 5 PCR reactions spanning the 5 integrated  
711 promoters and amplifying from 1,200 - 1,700 bp. The PCR products were validated using a  
712 LabChip GX II (Perkin Elmer) and sequenced using PlateSeq PCR Kits (Eurofins) according to  
713 the manufacturer's instructions. From the LabChip results, a PCR reaction was considered as  
714 trusted if it showed a strong band of the correct size, not trusted if it showed a strong band of  
715 the wrong size, and as no information gained if it showed a weak or no band. From the  
716 sequencing results, a sequencing reaction was considered as trusted if it showed an  
717 unambiguous sequence of the expected length (i.e. only limited by length of PCR fragment,  
718 stretches of the same nucleotide in the promoter or of about 1,000 bp limit of sanger sequencing  
719 reactions), not trusted if it showed an unambiguous sequence of the expected length with an  
720 assembly error, and no information gained if there were no or bad sequence results. If one or  
721 more sequencing results from the same strain showed double peaks in the promoter region the  
722 strain was considered as a double population. Finally, the promoter was noted as failed  
723 assembly (FA) if either LabChip and or sequencing results were considered not trusted, as no  
724 information (NI) if the sequencing result was no information and else as the promoter predicted  
725 by pairwise alignment between sequencing results and promoter sequence.

726

### 727 *Measuring fluorescence and growth*

728 Yeast cells were cultured ON to saturation, diluted to OD<sub>600</sub> 0.025 (measured by reading  
729 the absorbance at 600 nm on Synergy Mx Microplate Reader, BioTek) and then cultured again  
730 in a Synergy Mx Microplate Reader. While culturing, the reader measured OD<sub>600</sub> and  
731 fluorescence with excitation and emission wavelengths of 485 and 515 nm, respectively every  
732 15 min for 20 hrs. All wells were sealed with VIEWseal membrane (Greiner Bio-One).

733

## 734 **QUANTIFICATION AND STATISTICAL ANALYSIS**

735

### 736 *Modelling*

737 All genotype and time series data as well as scripts for preprocessing are publicly  
738 available (see section DATA AND SOFTWARE AVAILABILITY). Briefly, all OD and GFP  
739 measurements were subtracted background signal (i.e. mean value of OD and GFP  
740 measurements in wells containing pure media). Background signals were calculated for each  
741 96-well plate. Strains were quality-controlled based on 5 criteria. The criteria were: 1. Optical  
742 densities must cover the whole range up to 0.15 OD units to exclude uninoculated wells and  
743 wells with insufficient growth, 2. Sequencing results must exist for all five promoter gene  
744 junctions, 3. The integrated sequence must be exactly as designed, 4. The complementation  
745 plasmid must be cured, and 5. The sequencing results must not indicate the presence of  
746 multiple genotypes (Figure S5A). GFP synthesis rates were calculated in the OD<sub>600</sub> interval from  
747 0.075 to 0.150, as measured by a Synergy Mx Microplate Reader from BioTek.

748 In the ART approach, outliers were identified and removed based on replicate  
749 differences in GFP synthesis rate relative to the mean value for the strain. Replicates with the  
750 one percent most extreme differences were identified and the corresponding strains were  
751 removed. GFP synthesis rate was modelled as a function of promoter combination, represented  
752 through one-hot encoding, using the Automated Recommendation Tool (ART; Radivojević et al.,  
753 2019). Briefly, ART uses a probabilistic ensemble model consisting of eight individual models.  
754 The weight of each ensemble model is considered a random variable with a probability  
755 distribution characterized by the available training data, and determined through Bayesian  
756 inference and Markov Chain Monte Carlo (Brooks et al., 2011). ART uses the trained ensemble  
757 model in combination with a Parallel Tempering approach (Earl and Deem, 2005) to recommend  
758 30 new promoter combinations (unseen designs), which are predicted to improve production.  
759 The recommended designs were chosen as the 30 strains with the highest expected GFP  
760 synthesis rate predicted by the model. This recommendation approach was labelled exploitative  
761 since predictions with high uncertainty were not prioritized, although ART can provide both  
762 exploitative and explorative recommendations

763 For the TeselaGen EVOLVE algorithm used in this study, outliers were identified and  
764 removed based on a method described by Rousseeuw and Hubert (2011). The decision was  
765 made on a per strain basis taking into account replicate to mean value differences. In cases  
766 where just a single replicate was left after filtering, this replicate were excluded as well. Of the

767 remaining strains, GFP synthesis rate were modelled as a function of promoter combination  
768 coded as categorical variables using a TeselaGen-developed machine learning algorithm based  
769 on Bayesian Optimization (Mockus, 1994). The algorithm was set-up to recommend 30 new  
770 promoter combinations (unseen designs), and designs were chosen by highest selection score.  
771 The selection score was the expected improvement (Bergstra et al., 2011), calculated based on  
772 predicted high GFP synthesis rate and the uncertainty of prediction. The approach was labelled  
773 explorative since high uncertainty weighed positively in the selection score calculation. While  
774 using EVOLVE for explorative recommendations, thereby complementing the ART approach, it  
775 should be mentioned that EVOLVE can be set up to provide both explorative and exploitative  
776 recommendations.

777

## 778 **DATA AND SOFTWARE AVAILABILITY**

779

780 The complete flux balance analysis, with additional simulation details and filtering  
781 criteria, is publicly available at <https://github.com/biosustain/trp-scores>. The genotype and time  
782 series datasets generated during this study are available at The Joint BioEnergy Institute's  
783 Inventory of Composable Elements (ICE; <https://public-registry.jbei.org>) and Experiment Data  
784 Depot (EDD; <https://public-edd.jbei.org>), respectively under the study 'Zhang and Petersen, et al  
785 2019' (Ham et al., 2012; Morrell et al., 2017). The complete preprocessing and all statistical  
786 calculations are documented in a jupyter notebook, available at  
787 [https://github.com/sorpet/Zhang\\_and\\_Petersen\\_et\\_al\\_2019](https://github.com/sorpet/Zhang_and_Petersen_et_al_2019). The notebook also contains the  
788 ART approach for modeling and strain recommendations. The Teselagen software is available  
789 through commercial and non-commercial licenses (<https://teselagen.com>).

790

## 791 **SUPPLEMENTAL ITEM TITLES**

792

793 **Figure S1. Related to Figure 1. Dendrogram of the sequence diversity of 30 selected**  
794 **native yeast promoters.** Sequence pTEF1c1a with a single nucleotide change from pTEF1 has  
795 been added as a reference. The dendrogram was constructed using the neighbor-joining  
796 method (Saitou and Nei, 1987; Studier and Keppler, 1988).

797

798 **Figure S2. Related to Figure 1. Genotyping strategy.** Schematic outline of the genotyping  
799 strategy to assess correct *in vivo* junction-junction assemblies of 11 parts, and the integration at  
800 EasyClone site XII-5 (Jensen et al., 2014). Marked in red are chromosomal regions of

801 EasyClone site XII-5, whereas green marks the promoters, and yellow the coding sequences  
802 and terminators. Marked in blue is the selectable *HIS3* expression cassette, while genotyping  
803 PCRs are marked in light red. Primers used for sequencing of the 5 PCR reactions are marked  
804 seq1-seq5.

805

806 **Figure S3. Related to Figure 3. Biosensor development and characterization.** Overnight  
807 cultures of the strain containing sensor and reporter was used to inoculate fresh media  
808 supplemented with various concentrations of tryptophan and grown for 6 hours (early-mid  
809 exponential phase). Optical density (measured as absorbance at 600 nm) was used to  
810 normalize the green fluorescence (excitation/emission at 485/515 nm). (A) *E. coli trpR* was  
811 directly expressed in a yeast strain harboring the yEGFP reporter under the control of *TEF1*  
812 promoter containing *trpO* sequence inserted downstream of the TATA-like element. (B) The  
813 *trpR* gene was fused to the C-terminus of the activator domain of GAL4 (*GAL4<sub>ad</sub>*) with a  
814 GSGSGS linker, turning this transcriptional repressor into an activator (*trpAD*). Accordingly, the  
815 *trpO* sequence was placed upstream of a truncated *TEF1* promoter (lacking region with multiple  
816 Rap1-binding sites).

817

818 **Figure S4. Related to Figure 3E-F. Parameter estimation from time series data.** (A)  
819 Representative growth curve of *S. cerevisiae* in microtiter plates. *S. cerevisiae* was grown in  
820 yeast synthetic drop-out media in 96-well microtiter plates, and cell density measured at 600 nm  
821 ( $OD_{600}$ ) over 24 hrs. (B) Representative tryptophan biosensor output measured as fluorescence  
822 (GFP) in *S. cerevisiae* cells ( $n = 1$ ). *S. cerevisiae* was grown in yeast synthetic drop-out media  
823 in 96-well microtiter plates, and GFP measured at 485 nm ( $OD_{485}$ ) over 24 hrs. (C) Tryptophan  
824 biosensor output normalized by absorbance at 600 nm ( $OD_{600}$ ) over 24 hrs. For (A-C) the red  
825 line shows model fitting using a univariate spline. All plots represent a single replicate  
826 measurement ( $n = 1$ ). The green, yellow and blue markers indicate  $OD_{600} = 0.075$ ,  $OD_{600} = 0.15$ ,  
827 and maximum rate of  $OD_{600}$  increase, respectively.

828

829 **Figure S5. Related to Figures 3-4. Data filtering and outlier removal.** (A) Schematic  
830 illustration of the various filtering steps applied for data quality control. The six steps used for  
831 filtering are indicated by number to the left, and listed to the right are the numbers of unique  
832 genotypes as inferred from sequencing, the number of strains, and the number of experimental  
833 units (Exp. units,  $n = 3$ ). (B) The distribution of absolute differences between replicate  
834 measurements ( $n = 3$ ) of strain GFP synthesis rate. (C) Same as in (B), but with y-axis



835 expanded by a factor 10. For (B-C) the dashed red lines delimits the 1% most extreme  
836 differences between replicates which were removed in the ART modelling approach. (D) GFP  
837 synthesis rate compared to strain genotype (n = 3). The data is ordered according to decreasing  
838 mean GFP synthesis rate. Data points included in the TeselaGen EVOLVE modeling approach  
839 are shown in green, whereas data points in red or black were excluded. Red markers indicate  
840 outliers whereas black markers indicates strains for which only one replicate is left after outlier  
841 removal.

842

843 **Figure S6. Construction of an easy-curable plasmid using counter selection.** Two dosage  
844 sensitive genes (*ACT1* & *CDC14*) were expressed under the control of the galactose-inducible  
845 *GAL1* promoter and cloned into USER vector pRS413-mKate2 (pCfB2866, Zhang et al., 2016).  
846 To test the efficiency of counter selection, yeast strain with a plasmid containing one of the  
847 counter selection cassettes (pRS413-HIS3  $P_{GAL1}$ -*ACT1*-T<sub>IDP1</sub> or  $P_{GAL1}$ -*CDC14*-T<sub>ADH1</sub>) was grown  
848 in both non-induction (synthetic complete + glucose) and induction (synthetic complete +  
849 galactose) media for 18 hrs. A diluted aliquot of culture was spread onto both YPD (without  
850 selection for the *HIS3* selectable marker) and SC-HIS (with selection for the *HIS3* selectable  
851 marker) drop out agar plates. Only cultures without growth on SC-HIS selective media were  
852 used for further studies.

853

854 **Table S1.** Primers used in study. Sequence features of interest are separated by a space.

855

856 **Table S2.** Plasmids constructed and used in study.

857

858 **Table S3.** Yeast strains engineered and used in study.

859

860 **Table S4.** Related to Figure 1. Gene scores of all 192 genome-scale modelled (FBA) genes  
861 with significant changes in flux towards tryptophan production under glucose and ethanol  
862 conditions. A score higher than one means the gene is an up-regulation candidate, a score  
863 between zero and one means the gene is a down-regulation candidate, a score equal to zero  
864 means the gene is a knockout candidate, and a blank score means the gene is associated to  
865 reactions that do not change significantly in flux as tryptophan production increases under that  
866 particular condition. The four out of five gene targets identified by FBA and selected for this  
867 study are marked in bold.

868

869 **Table S5.** Related to Figure 1. FBA results for all pathways in metabolism, including the number  
870 of gene targets predicted in each pathway, the total size of each pathway, the fraction of genes  
871 in each pathway that are gene targets, and the significance of that representation in each  
872 pathway compared to the rest of metabolism (“Whole metabolism”), indicated by a P-value  
873 computed with a Fisher's exact test.

874

875 **Table S6.** Related to Figure 1. The 30 selected native yeast promoters, and their position in the  
876 combinatorial cluster.

877

878 **Table S7.** Related to Figure 3D. Promoter combinations of library control strains. The numbers  
879 in each row refer to promoter numbers as shown in Table S5. Design no. 1 contains the  
880 promoters that are native to the genes at the five positions.

881

882 **Table S8.** Related to Figure 1 and 4C. Top-30 promoter combinations as recommended by  
883 ART. Size of color bars indicate promoter expression strength (see Figure 1), and column  
884 “d<sub>gfp</sub>/dt” shows predicted GFP synthesis rate.

885

886 **Table S9.** Related to Figure 1 and 4C. Top-30 promoter combinations as recommended by  
887 TeselaGen EVOLVE. Size of color bars indicate promoter expression strength (see Figure 1),  
888 and column “d<sub>gfp</sub>/dt” shows predicted GFP synthesis rate.

889

## 890 REFERENCES

891

- 892 Alonso-Gutierrez, J., Kim, E.-M., Batth, T.S., Cho, N., Hu, Q., Chan, L.J.G., Petzold, C.J.,  
893 Hillson, N.J., Adams, P.D., Keasling, J.D., et al. (2015). Principal component analysis of  
894 proteomics (PCAP) as a tool to direct metabolic engineering. *Metab. Eng.* 28, 123–133.  
895 Aung, H.W., Henry, S.A., and Walker, L.P. (2013). Revising the Representation of Fatty Acid,  
896 Glycerolipid, and Glycerophospholipid Metabolism in the Consensus Model of Yeast  
897 Metabolism. *Ind. Biotechnol.* 9, 215–228.  
898 Aversch, N.J.H., and Krömer, J.O. (2018). Metabolic Engineering of the Shikimate Pathway for  
899 Production of Aromatics and Derived Compounds—Present and Future Strain Construction  
900 Strategies. *Front. Bioeng. Biotechnol.* 6.  
901 Bergstra, J., Bardenet, R., Bengio, Y., and Kégl, B. (2011). Algorithms for Hyper-parameter  
902 Optimization. In *Proceedings of the 24th International Conference on Neural Information  
903 Processing Systems*, (USA: Curran Associates Inc.), pp. 2546–2554.  
904 Bitinaite, J., Rubino, M., Varma, K.H., Schildkraut, I., Vaisvila, R., and Vaiskunaite, R. (2007).  
905 USER<sup>TM</sup> friendly DNA engineering and cloning method by uracil excision. *Nucleic Acids Res.*  
906 35, 1992–2002.  
907 Braus, G.H. (1991). Aromatic amino acid biosynthesis in the yeast *Saccharomyces cerevisiae*: a

- 908 model system for the regulation of a eukaryotic biosynthetic pathway. *Microbiol. Rev.* **55**, 349–  
909 370.
- 910 Breslow, D.K., Cameron, D.M., Collins, S.R., Schuldiner, M., Stewart-Ornstein, J., Newman,  
911 H.W., Braun, S., Madhani, H.D., Krogan, N.J., and Weissman, J.S. (2008). A comprehensive  
912 strategy enabling high-resolution functional analysis of the yeast genome. *Nat. Methods* **5**, 711–  
913 718.
- 914 Brooks, S., Gelman, A., Jones, G.L., and Meng, X.-L. (2011). *Handbook of Markov Chain Monte  
915 Carlo* (CRC Press).
- 916 Camacho, D.M., Collins, K.M., Powers, R.K., Costello, J.C., and Collins, J.J. (2018). Next-  
917 Generation Machine Learning for Biological Networks. *Cell* **173**, 1581–1592.
- 918 Carbonell, P., Radivojevic, T., and García Martín, H. (2019). Opportunities at the Intersection of  
919 Synthetic Biology, Machine Learning, and Automation. *ACS Synth. Biol.* **8**, 1474–1477.
- 920 Carro, M.S., Lim, W.K., Alvarez, M.J., Bollo, R.J., Zhao, X., Snyder, E.Y., Sulman, E.P., Anne,  
921 S.L., Doetsch, F., Colman, H., et al. (2010). The transcriptional network for mesenchymal  
922 transformation of brain tumours. *Nature* **463**, 318–325.
- 923 Cherry, J.M., Hong, E.L., Amundsen, C., Balakrishnan, R., Binkley, G., Chan, E.T., Christie,  
924 K.R., Costanzo, M.C., Dwight, S.S., Engel, S.R., et al. (2012). *Saccharomyces Genome  
925 Database: the genomics resource of budding yeast*. *Nucleic Acids Res.* **40**, D700–D705.
- 926 Choi, K.R., Jang, W.D., Yang, D., Cho, J.S., Park, D., and Lee, S.Y. (2019). Systems Metabolic  
927 Engineering Strategies: Integrating Systems and Synthetic Biology with Metabolic Engineering.  
928 *Trends Biotechnol.* **37**, 817–837.
- 929 Costello, Z., and Martin, H.G. (2018). A machine learning approach to predict metabolic  
930 pathway dynamics from time-series multiomics data. *Npj Syst. Biol. Appl.* **4**.
- 931 Curran, K.A., Leavitt, J.M., Karim, A.S., and Alper, H.S. (2013). Metabolic engineering of  
932 muconic acid production in *Saccharomyces cerevisiae*. *Metab. Eng.* **15**, 55–66.
- 933 Earl, D.J., and Deem, M.W. (2005). Parallel tempering: Theory, applications, and new  
934 perspectives. *Phys. Chem. Chem. Phys.* **7**, 3910–3916.
- 935 Feng, Y., De Franceschi, G., Kahraman, A., Soste, M., Melnik, A., Boersema, P.J., de Laureto,  
936 P.P., Nikolaev, Y., Oliveira, A.P., and Picotti, P. (2014). Global analysis of protein structural  
937 changes in complex proteomes. *Nat. Biotechnol.* **32**, 1036–1044.
- 938 Ferreira, R., Skrekas, C., Hedin, A., Sánchez, B.J., Siewers, V., Nielsen, J., and David, F.  
939 (2019). Model-Assisted Fine-Tuning of Central Carbon Metabolism in Yeast through dCas9-  
940 Based Regulation. *ACS Synth. Biol.*
- 941 Gardner, T.S. (2013). Synthetic biology: from hype to impact. *Trends Biotechnol.* **31**, 123–125.
- 942 Gietz, R.D., and Schiestl, R.H. (2007). Quick and easy yeast transformation using the LiAc/SS  
943 carrier DNA/PEG method. *Nat. Protoc.* **2**, 35–37.
- 944 Graf, R., Mehmman, B., and Braus, G.H. (1993). Analysis of feedback-resistant anthranilate  
945 synthases from *Saccharomyces cerevisiae*. *J. Bacteriol.* **175**, 1061–1068.
- 946 Gunsalus, R.P., and Yanofsky, C. (1980). Nucleotide sequence and expression of *Escherichia  
947 coli trpR*, the structural gene for the trp aporepressor. *Proc. Natl. Acad. Sci. U. S. A.* **77**, 7117–  
948 7121.
- 949 Guzmán, G.I., Utrilla, J., Nurk, S., Brunk, E., Monk, J.M., Ebrahim, A., Palsson, B.O., and Feist,  
950 A.M. (2015). Model-driven discovery of underground metabolic functions in *Escherichia coli*.  
951 *Proc. Natl. Acad. Sci.* **112**, 929–934.
- 952 Ham, T.S., Dmytriv, Z., Plahar, H., Chen, J., Hillson, N.J., and Keasling, J.D. (2012). Design,  
953 implementation and practice of JBEI-ICE: an open source biological part registry platform and  
954 tools. *Nucleic Acids Res.* **40**, e141–e141.
- 955 Hartmann, M., Schneider, T.R., Pfeil, A., Heinrich, G., Lipscomb, W.N., and Braus, G.H. (2003).  
956 Evolution of feedback-inhibited / barrel isoenzymes by gene duplication and a single mutation.  
957 *Proc. Natl. Acad. Sci.* **100**, 862–867.
- 958 Hefzi, H., Ang, K.S., Hanscho, M., Bordbar, A., Ruckerbauer, D., Lakshmanan, M., Orellana,

959 C.A., Baycin-Hizal, D., Huang, Y., Ley, D., et al. (2016). A Consensus Genome-scale  
960 Reconstruction of Chinese Hamster Ovary Cell Metabolism. *Cell Syst.* 3, 434-443.e8.  
961 Heirendt, L., Arreckx, S., Pfau, T., Mendoza, S.N., Richelle, A., Heinken, A., Haraldsdóttir, H.S.,  
962 Wachowiak, J., Keating, S.M., Vlasov, V., et al. (2019). Creation and analysis of biochemical  
963 constraint-based models using the COBRA Toolbox v.3.0. *Nat. Protoc.* 14, 639–702.  
964 Jakočiūnas, T., Rajkumar, A.S., Zhang, J., Arsovska, D., Rodriguez, A., Jendresen, C.B.,  
965 Skjød, M.L., Nielsen, A.T., Borodina, I., Jensen, M.K., et al. (2015). CasEMBLR: Cas9-  
966 Facilitated Multiloci Genomic Integration of in Vivo Assembled DNA Parts in *Saccharomyces*  
967 *cerevisiae*. *ACS Synth. Biol.* 4, 1226–1234.  
968 Jakočiūnas, T., Bonde, I., Herrgård, M., Harrison, S.J., Kristensen, M., Pedersen, L.E., Jensen,  
969 M.K., and Keasling, J.D. (2015). Multiplex metabolic pathway engineering using CRISPR/Cas9  
970 in *Saccharomyces cerevisiae*. *Metab. Eng.* 28, 213–222.  
971 Jensen, N.B., Strucko, T., Kildegaard, K.R., David, F., Maury, J., Mortensen, U.H., Forster, J.,  
972 Nielsen, J., and Borodina, I. (2014). EasyClone: method for iterative chromosomal integration of  
973 multiple genes in *Saccharomyces cerevisiae*. *FEMS Yeast Res.* 14, 238–248.  
974 Jervis, A.J., Carbonell, P., Vinaixa, M., Dunstan, M.S., Hollywood, K.A., Robinson, C.J., Rattray,  
975 N.J.W., Yan, C., Swainston, N., Currin, A., et al. (2019). Machine Learning of Designed  
976 Translational Control Allows Predictive Pathway Optimization in *Escherichia coli*. *ACS Synth.*  
977 *Biol.* 8, 127–136.  
978 Jeschek, M., Gerngross, D., and Panke, S. (2016). Rationally reduced libraries for combinatorial  
979 pathway optimization minimizing experimental effort. *Nat. Commun.* 7, 11163.  
980 Jeschek, M., Gerngross, D., and Panke, S. (2017). Combinatorial pathway optimization for  
981 streamlined metabolic engineering. *Curr. Opin. Biotechnol.* 47, 142–151.  
982 Jessop Fabre, M.M., Jakočiūnas, T., Stovicek, V., Dai, Z., Jensen, M.K., Keasling, J.D., and  
983 Borodina, I. (2016). EasyClone MarkerFree: A vector toolkit for markerless integration of  
984 genes into *Saccharomyces cerevisiae* via CRISPR-Cas9. *Biotechnol. J.* 11, 1110–1117.  
985 Keasling, J.D. (2010). Manufacturing Molecules through Metabolic Engineering. *Science* 330,  
986 1355–1358.  
987 Khodayari, A., Chowdhury, A., and Maranas, C.D. (2015). Succinate Overproduction: A Case  
988 Study of Computational Strain Design Using a Comprehensive *Escherichia coli* Kinetic Model.  
989 *Front. Bioeng. Biotechnol.* 2.  
990 Kuijpers, N.G.A., Solis-Escalante, D., Luttk, M.A.H., Bisschops, M.M.M., Boonekamp, F.J., van  
991 den Broek, M., Pronk, J.T., Daran, J.-M., and Daran-Lapujade, P. (2016). Pathway swapping:  
992 Toward modular engineering of essential cellular processes. *Proc. Natl. Acad. Sci.* 113, 15060–  
993 15065.  
994 Lahtvee, P.J., Sánchez, B.J., Smialowska, A., Kasvandik, S., Elsemman, I.E., Gatto, F., and  
995 Nielsen, J. (2017). Absolute Quantification of Protein and mRNA Abundances Demonstrate  
996 Variability in Gene-Specific Translation Efficiency in Yeast. *Cell Syst.* 4, 495-504.e5.  
997 Lee, S., Lim, W.A., and Thorn, K.S. (2013). Improved Blue, Green, and Red Fluorescent Protein  
998 Tagging Vectors for *S. cerevisiae*. *PLoS ONE* 8, e67902.  
999 Lewis, N.E., Hixson, K.K., Conrad, T.M., Lerman, J.A., Charusanti, P., Polpitiya, A.D., Adkins,  
1000 J.N., Schramm, G., Purvine, S.O., Lopez Ferrer, D., et al. (2010). Omic data from evolved *E.*  
1001 *coli* are consistent with computed optimal growth from genome-scale models. *Mol. Syst. Biol.*  
1002 6.  
1003 Lewis, N.E., Nagarajan, H., and Palsson, B.O. (2012). Constraining the metabolic genotype–  
1004 phenotype relationship using a phylogeny of in silico methods. *Nat. Rev. Microbiol.* 10, 291–  
1005 305.  
1006 Lingens, F., Goebel, W., and Uesseler, H. (1967). Regulation der Biosynthese der aromatischen  
1007 Aminosäuren in *Saccharomyces cerevisiae*. *Eur. J. Biochem.* 1, 363–374.  
1008 Liu, Y., and Nielsen, J. (2019). Recent trends in metabolic engineering of microbial chemical  
1009 factories. *Curr. Opin. Biotechnol.* 60, 188–197.



- 1010 Liu, H., Krizek, J., and Bretscher, A. (1992). Construction of a GAL1-regulated yeast cDNA  
1011 expression library and its application to the identification of genes whose overexpression causes  
1012 lethality in yeast. *Genetics* *132*, 665–673.
- 1013 Long, C.P., and Antoniewicz, M.R. (2019). Metabolic flux responses to deletion of 20 core  
1014 enzymes reveal flexibility and limits of *E. coli* metabolism. *Metab. Eng.*
- 1015 Lööke, M., Kristjuhan, K., and Kristjuhan, A. (2011). Extraction of genomic DNA from yeasts for  
1016 PCR-based applications. *BioTechniques* *50*, 325–328.
- 1017 Lu, H., Li, F., Sánchez, B.J., Zhu, Z., Li, G., Domenzain, I., Marcišauskas, S., Anton, P.M.,  
1018 Lappa, D., Lieven, C., et al. (2019). A consensus *S. cerevisiae* metabolic model Yeast8 and its  
1019 ecosystem for comprehensively probing cellular metabolism. *Nat. Commun.* *10*.
- 1020 Luo, H., Hansen, A.S.L., Yang, L., Schneider, K., Kristensen, M., Christensen, U., Christensen,  
1021 H.B., Du, B., Özdemir, E., Feist, A.M., et al. (2019). Coupling S-adenosylmethionine-dependent  
1022 methylation to growth: Design and uses. *PLOS Biol.* *17*, e2007050.
- 1023 Mahr, R., and Frunzke, J. (2016). Transcription factor-based biosensors in biotechnology:  
1024 current state and future prospects. *Appl. Microbiol. Biotechnol.* *100*, 79–90.
- 1025 Makanae, K., Kintaka, R., Makino, T., Kitano, H., and Moriya, H. (2013). Identification of  
1026 dosage-sensitive genes in *Saccharomyces cerevisiae* using the genetic tug-of-war method.  
1027 *Genome Res.* *23*, 300–311.
- 1028 Mellor, J., Grigoras, I., Carbonell, P., and Faulon, J.-L. (2016). Semisupervised Gaussian  
1029 Process for Automated Enzyme Search. *ACS Synth. Biol.* *5*, 518–528.
- 1030 Mockus, J. (1994). Application of Bayesian approach to numerical methods of global and  
1031 stochastic optimization. *J. Glob. Optim.* *4*, 347–365.
- 1032 Monk, J.M., Lloyd, C.J., Brunk, E., Mih, N., Sastry, A., King, Z., Takeuchi, R., Nomura, W.,  
1033 Zhang, Z., Mori, H., et al. (2017). iML1515, a knowledgebase that computes *Escherichia coli*  
1034 traits. *Nat. Biotechnol.* *35*, 904–908.
- 1035 Morrell, W.C., Birkel, G.W., Forrer, M., Lopez, T., Backman, T.W.H., Dussault, M., Petzold, C.J.,  
1036 Baidoo, E.E.K., Costello, Z., Ando, D., et al. (2017). The Experiment Data Depot: A Web-Based  
1037 Software Tool for Biological Experimental Data Storage, Sharing, and Visualization. *ACS Synth.*  
1038 *Biol.* *6*, 2248–2259.
- 1039 Nielsen, J., and Keasling, J.D. (2016). Engineering Cellular Metabolism. *Cell* *164*, 1185–1197.
- 1040 Orth, J.D., Thiele, I., and Palsson, B.Ø. (2010). What is flux balance analysis? *Nat. Biotechnol.*  
1041 *28*, 245–248.
- 1042 Park, S.H., Kim, H.U., Kim, T.Y., Park, J.S., Kim, S.-S., and Lee, S.Y. (2014). Metabolic  
1043 engineering of *Corynebacterium glutamicum* for L-arginine production. *Nat. Commun.* *5*.
- 1044 Patnaik, R., and Liao, J.C. (1994). Engineering of *Escherichia coli* central metabolism for  
1045 aromatic metabolite production with near theoretical yield. *Appl. Environ. Microbiol.* *60*, 3903–  
1046 3908.
- 1047 Pedregosa, F., Varoquaux, G., Gramfort, A., Michel, V., Thirion, B., Grisel, O., Blondel, M.,  
1048 Prettenhofer, P., Weiss, R., Dubourg, V., et al. (2011). Scikit-learn: Machine Learning in Python.  
1049 *J. Mach. Learn. Res.* *6*.
- 1050 Presnell, K.V., and Alper, H.S. (2019). Systems Metabolic Engineering Meets Machine  
1051 Learning: A New Era for Data-Driven Metabolic Engineering. *Biotechnol. J.* *0*, 1800416.
- 1052 Radivojević, T., Costello, Z., and Martin, H.G. (2019). ART: A machine learning Automated  
1053 Recommendation Tool for synthetic biology. *ArXiv191111091 Q-Bio Stat.*
- 1054 Rajkumar, A.S., Özdemir, E., Lis, A.V., Schneider, K., Qin, J., Jensen, M.K., and Keasling, J.D.  
1055 (2019). Engineered Reversal of Function in Glycolytic Yeast Promoters. *ACS Synth. Biol.* *8*,  
1056 1462–1468.
- 1057 Reider Apel, A., d’Espaux, L., Wehrs, M., Sachs, D., Li, R.A., Tong, G.J., Garber, M., Nnadi, O.,  
1058 Zhuang, W., Hillson, N.J., et al. (2017). A Cas9-based toolkit to program gene expression in  
1059 *Saccharomyces cerevisiae*. *Nucleic Acids Res.* *45*, 496–508.
- 1060 Rhee, H.S., and Pugh, B.F. (2012). Genome-wide structure and organization of eukaryotic pre-

1061 initiation complexes. *Nature* 483, 295–301.

1062 Rodriguez, A., Kildegaard, K.R., Li, M., Borodina, I., and Nielsen, J. (2015). Establishment of a  
1063 yeast platform strain for production of p-coumaric acid through metabolic engineering of  
1064 aromatic amino acid biosynthesis. *Metab. Eng.* 31, 181–188.

1065 Roesser, J.R., and Yanofsky, C. (1991). The effects of leader peptide sequence and length on  
1066 attenuation control of the trp operon of *E. coli*. *Nucleic Acids Res.* 19, 795–800.

1067 Rogers, J.K., Taylor, N.D., and Church, G.M. (2016). Biosensor-based engineering of  
1068 biosynthetic pathways. *Curr. Opin. Biotechnol.* 42, 84–91.

1069 Rousseeuw, P.J., and Hubert, M. (2011). Robust statistics for outlier detection: Robust statistics  
1070 for outlier detection. *Wiley Interdiscip. Rev. Data Min. Knowl. Discov.* 1, 73–79.

1071 Schläpfer, P., Zhang, P., Wang, C., Kim, T., Banf, M., Chae, L., Dreher, K., Chavali, A.K., Nilo-  
1072 Poyanco, R., Bernard, T., et al. (2017). Genome-Wide Prediction of Metabolic Enzymes,  
1073 Pathways, and Gene Clusters in Plants. *Plant Physiol.* 173, 2041–2059.

1074 Sikorski, R.S., and Hieter, P. (1989). A System of Shuttle Vectors and Yeast Host Strains  
1075 Designed for Efficient Manipulation of DNA in *Saccharomyces Cerevisiae*. *Genetics* 122, 19–27.

1076 Stephanopoulos, G. (1999). Metabolic Fluxes and Metabolic Engineering. *Metab. Eng.* 1, 1–11.

1077 Suástegui, M., and Shao, Z. (2016). Yeast factories for the production of aromatic compounds:  
1078 from building blocks to plant secondary metabolites. *J. Ind. Microbiol. Biotechnol.* 43, 1611–  
1079 1624.

1080 TeselaGen (2019). TeselaGen Technology including EVOLVE module.

1081 Vogt, M., Haas, S., Klaffl, S., Polen, T., Eggeling, L., van Ooyen, J., and Bott, M. (2014).  
1082 Pushing product formation to its limit: Metabolic engineering of *Corynebacterium glutamicum* for  
1083 l-leucine overproduction. *Metab. Eng.* 22, 40–52.

1084 Wolpert, D.H. (1996). The Lack of A Priori Distinctions Between Learning Algorithms. *Neural*  
1085 *Comput.* 8, 1341–1390.

1086 Yang, J., Gunasekera, A., Lavoie, T.A., Jin, L., Lewis, D.E.A., and Carey, J. (1996). In vivo and  
1087 in vitro Studies of TrpR-DNA Interactions. *J. Mol. Biol.* 258, 37–52.

1088 Yang, J.E., Park, S.J., Kim, W.J., Kim, H.J., Kim, B.J., Lee, H., Shin, J., and Lee, S.Y. (2018).  
1089 One-step fermentative production of aromatic polyesters from glucose by metabolically  
1090 engineered *Escherichia coli* strains. *Nat. Commun.* 9.

1091 Yin, Z. (1996). Multiple signalling pathways trigger the exquisite sensitivity of yeast  
1092 gluconeogenic mRNAs to glucose. *Mol. Microbiol.* 20, 751–764.

1093 Zampieri, G., Vijayakumar, S., Yaneske, E., and Angione, C. (2019). Machine and deep learning  
1094 meet genome-scale metabolic modeling. *PLOS Comput. Biol.* 15, e1007084.

1095 Zhang, J., Sonnenschein, N., Pihl, T.P.B., Pedersen, K.R., Jensen, M.K., and Keasling, J.D.  
1096 (2016). Engineering an NADPH/NADP<sup>+</sup> Redox Biosensor in Yeast. *ACS Synth. Biol.* 5, 1546–  
1097 1556

1098

1099



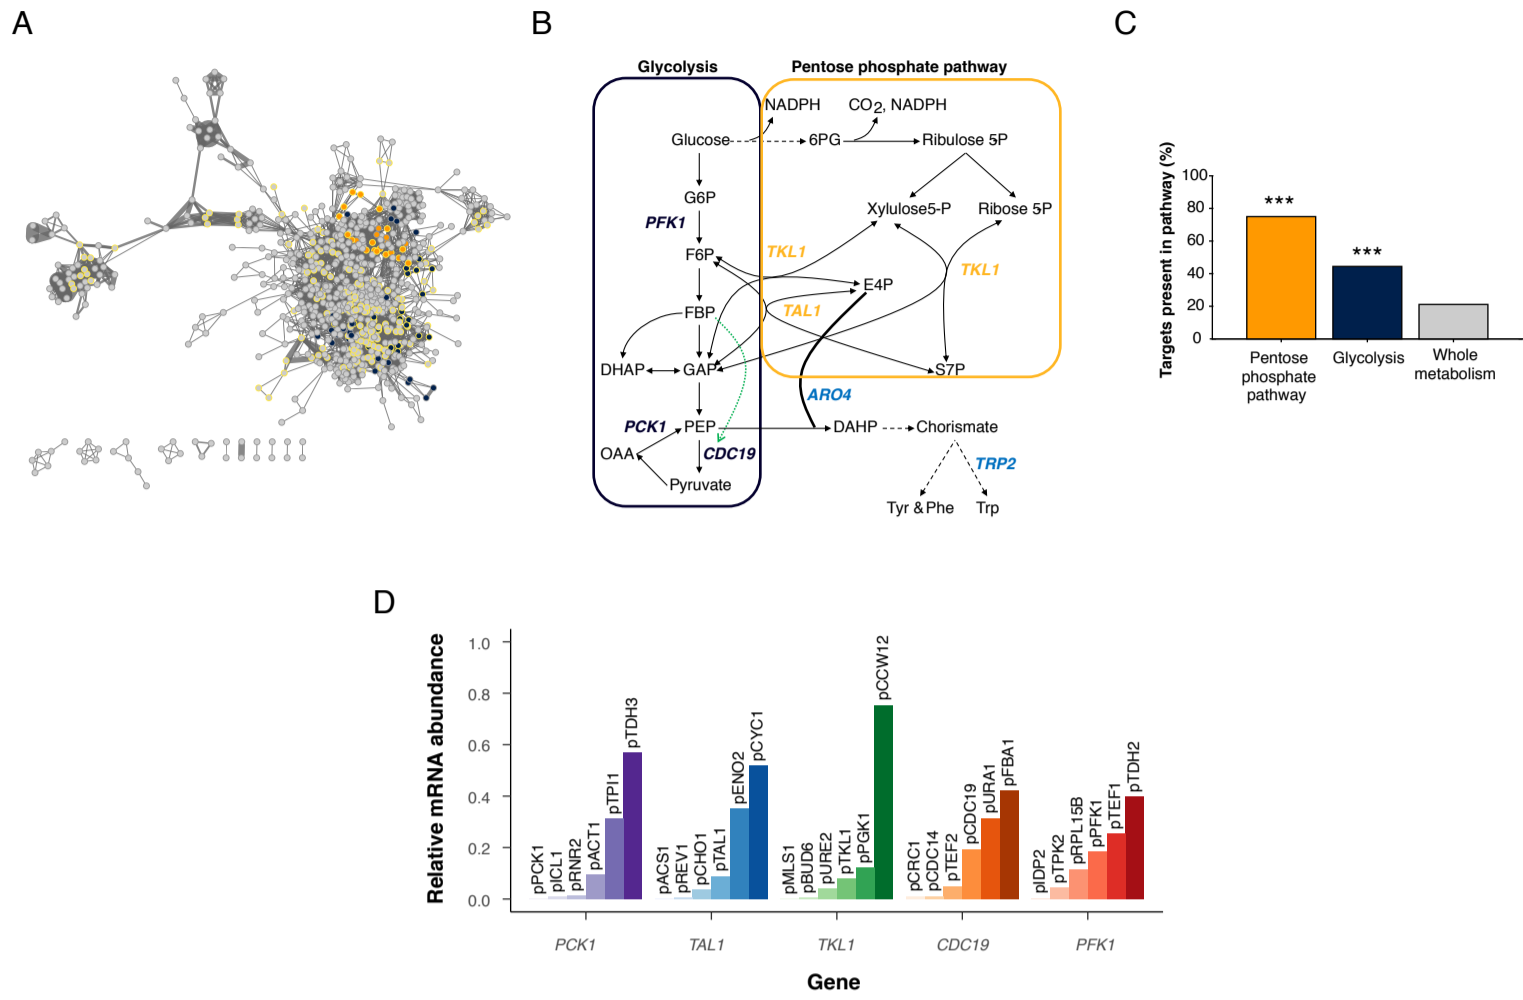

**Figure 1**

bioRxiv preprint doi: <https://doi.org/10.1101/858464>; this version posted November 29, 2019. The copyright holder for this preprint (which was not certified by peer review) is the author/funder, who has granted bioRxiv a license to display the preprint in perpetuity. It is made available under aCC-BY-ND 4.0 International license.

A

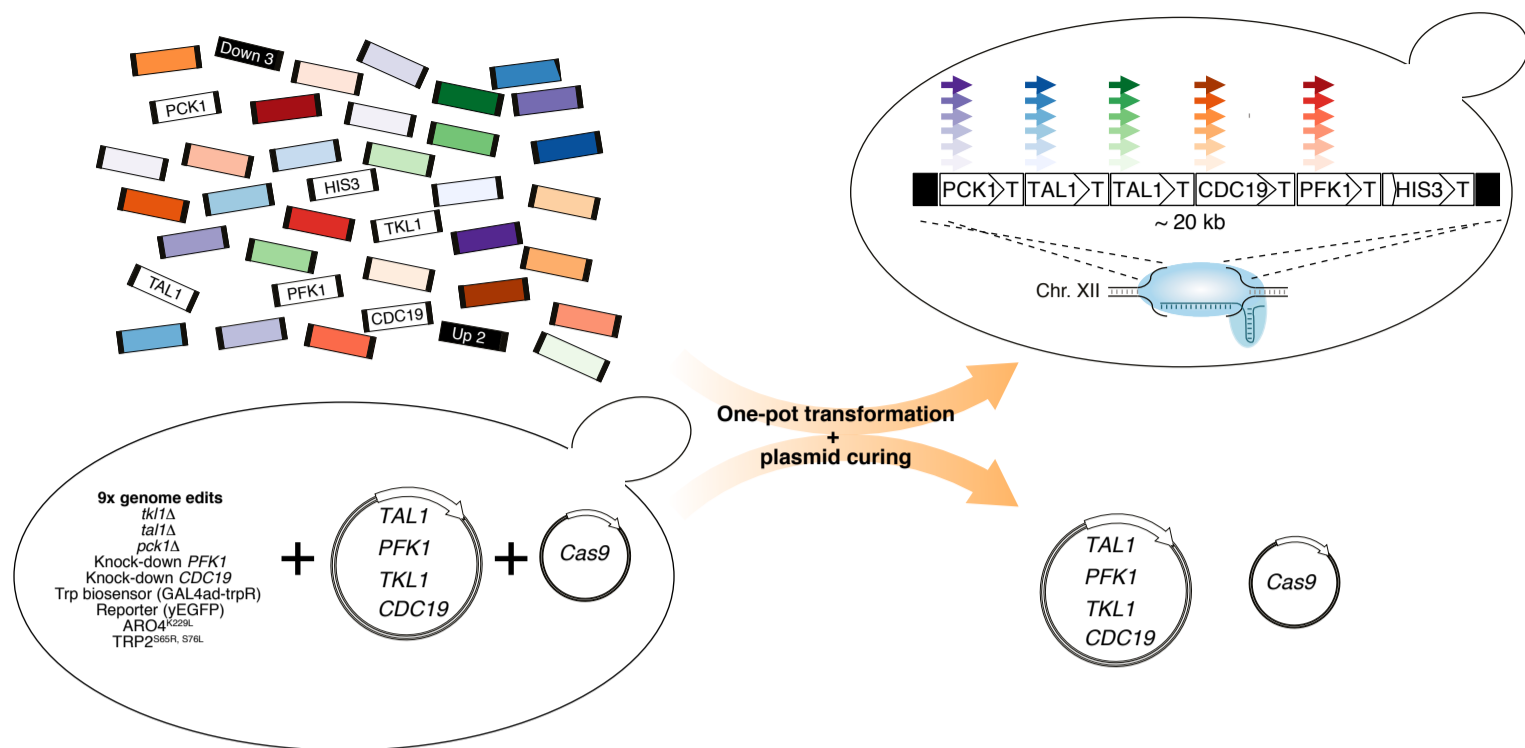

B

|                            |          |
|----------------------------|----------|
| Potential unique genotypes | 7,776    |
| Library colonies           | ~ 10,000 |
| Library sample             | 480      |
| Plasmid cured strains      | 92%      |
| Correct assembly           | 82%      |
| Repeated genotypes         | 3.7%     |

C

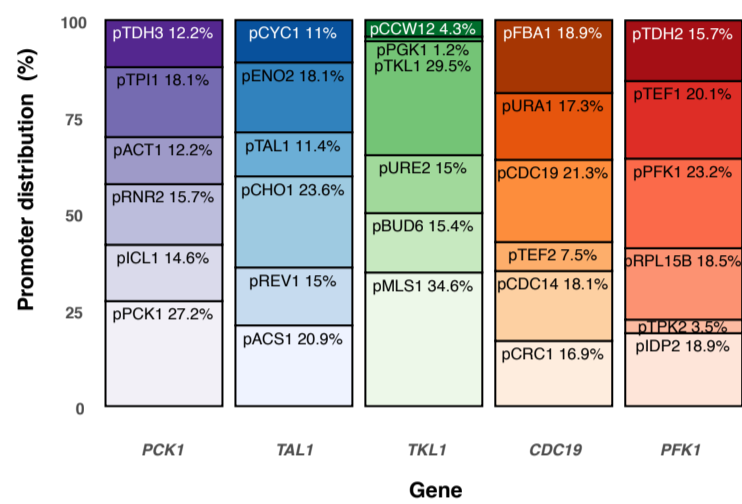

bioRxiv preprint doi: <https://doi.org/10.1101/858464>; this version posted November 29, 2019. The copyright holder for this preprint (which was not certified by peer review) is the author/funder, who has granted bioRxiv a license to display the preprint in perpetuity. It is made available under aCC-BY-ND 4.0 International license.

Figure 2

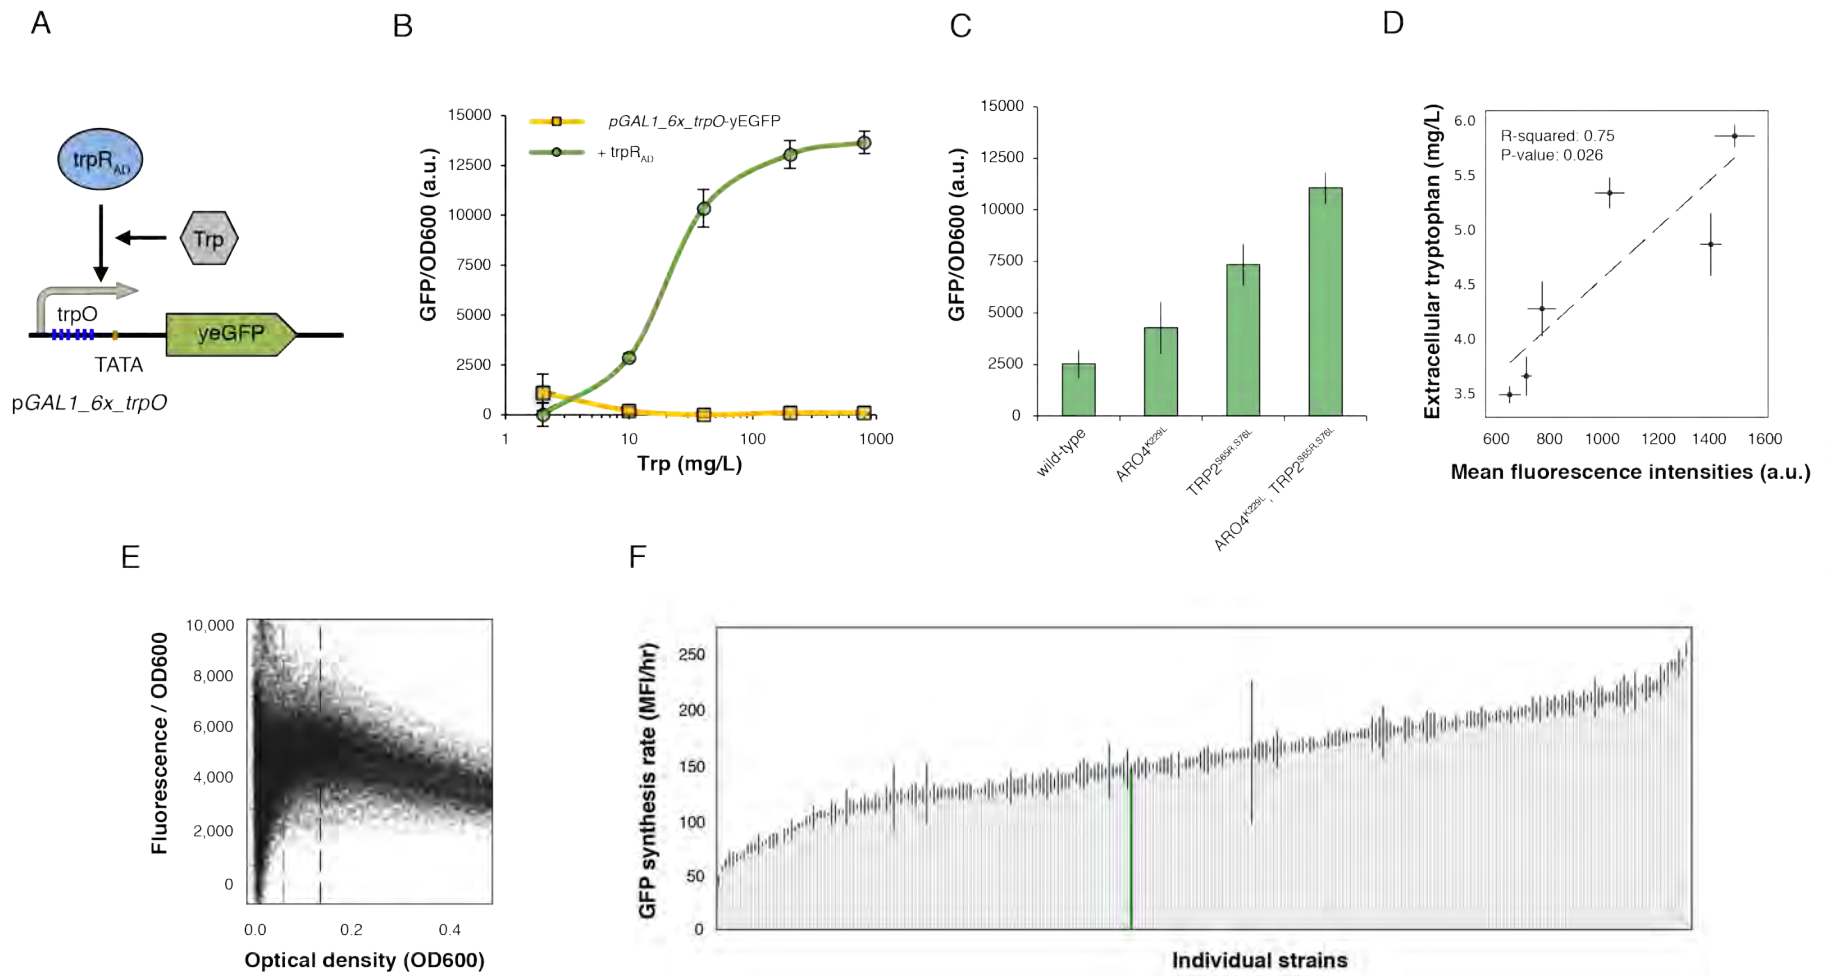

**Figure 3**

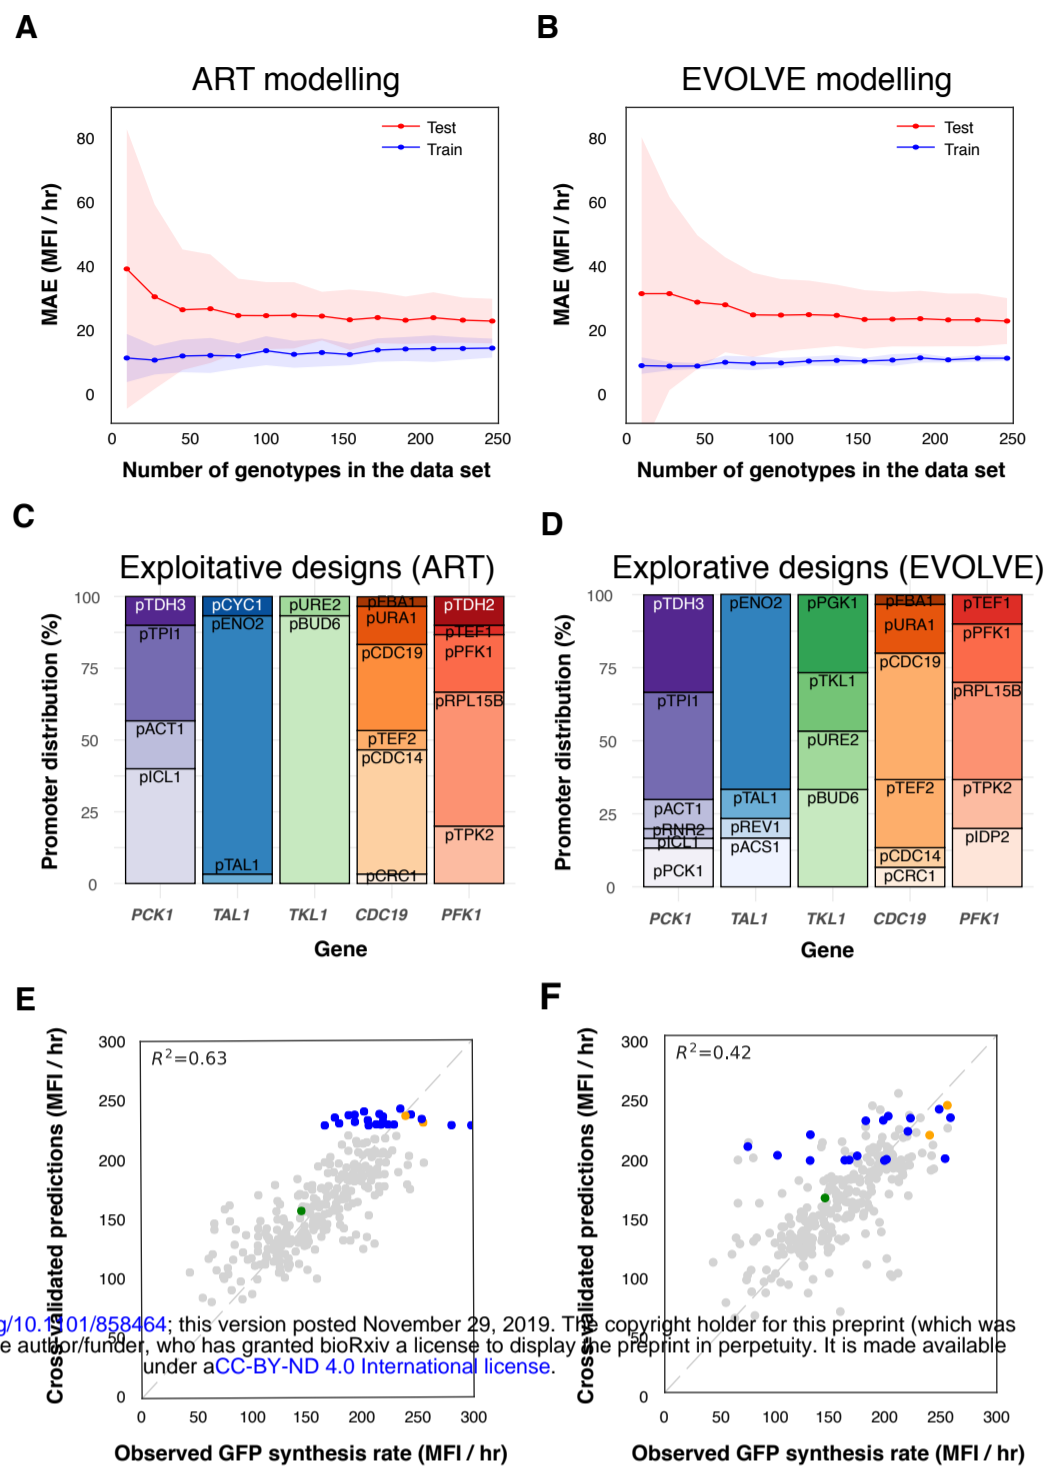

**Figure 4**
